# Supplementary material for: Genetic Association between the Levels of Plasma Lipids and the Risk of Aortic Aneurysm and Aortic Dissection: A Two-Sample Mendelian Randomization Study
Source: MDPI journal article supplement (doi:10.3390/jcm12051991), 2023-03-02
Supplement: s1 [file s1]

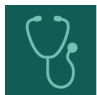

Article

# Genetic Association between the Levels of Plasma Lipids and the Risk of Aortic Aneurysm and Aortic Dissection: A Two-Sample Mendelian Randomization Study

Rui Li<sup>1,†</sup>, Chao Zhang<sup>1,†</sup>, Xinling Du<sup>1,\*</sup> and Shi Chen<sup>2,\*</sup>

<sup>1</sup> Department of Cardiovascular Surgery, Union Hospital, Tongji Medical College, Huazhong University of Science and Technology, Wuhan, China

<sup>2</sup> National Clinical Research Center for Cardiovascular Diseases, State Key Laboratory of Cardiovascular Disease, Fuwai Hospital, National Center for Cardiovascular Diseases, Chinese Academy of Medical Sciences and Peking Union Medical College, Beijing, China

\* Correspondence: xinlingdu@hust.edu.cn (X.D.); chenshi@fuwai.com (S.C.)

<sup>†</sup> These authors contributed equally to this work.

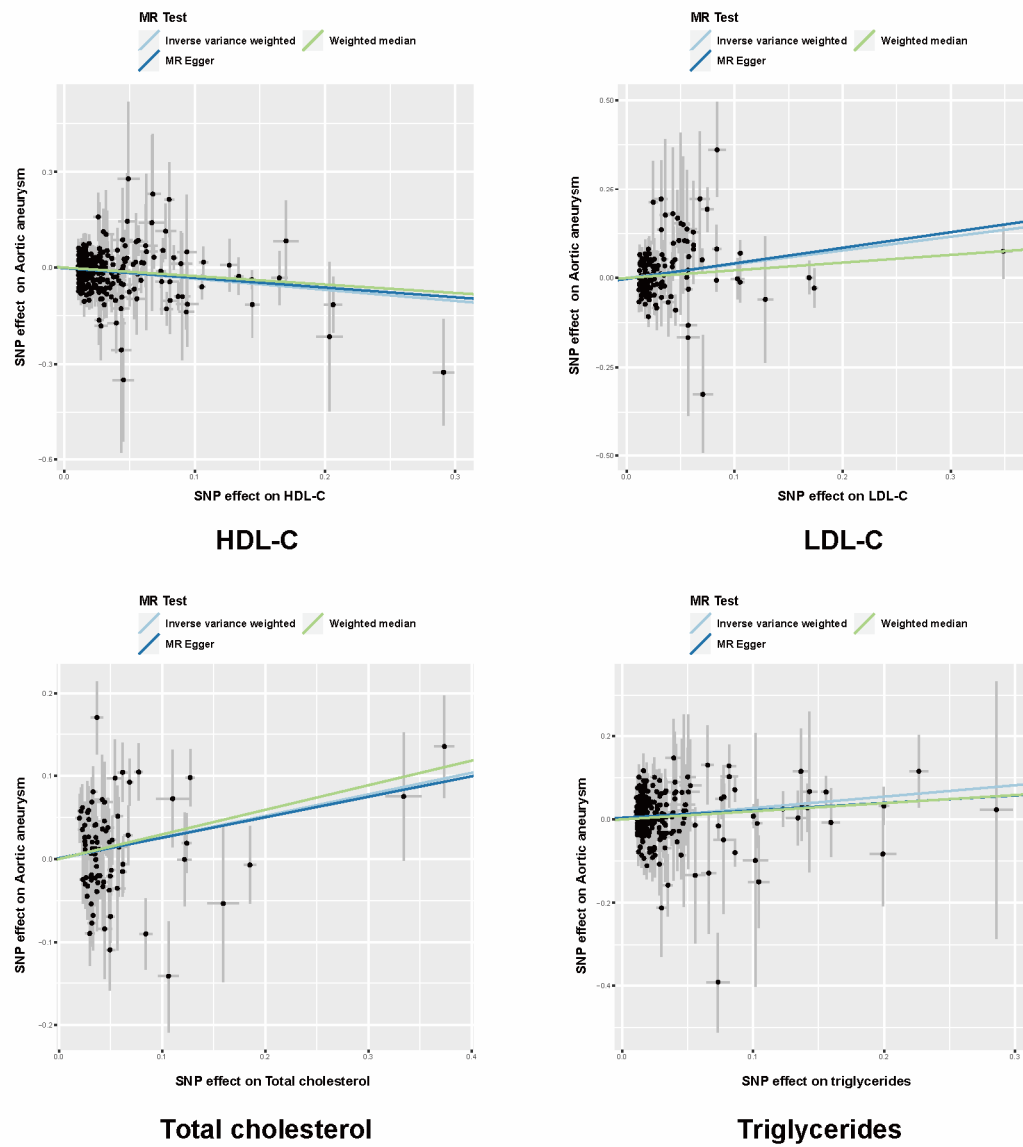

**Figure S1.** Scatter plots of the association between plasma lipids and the risk of aortic aneurysm.

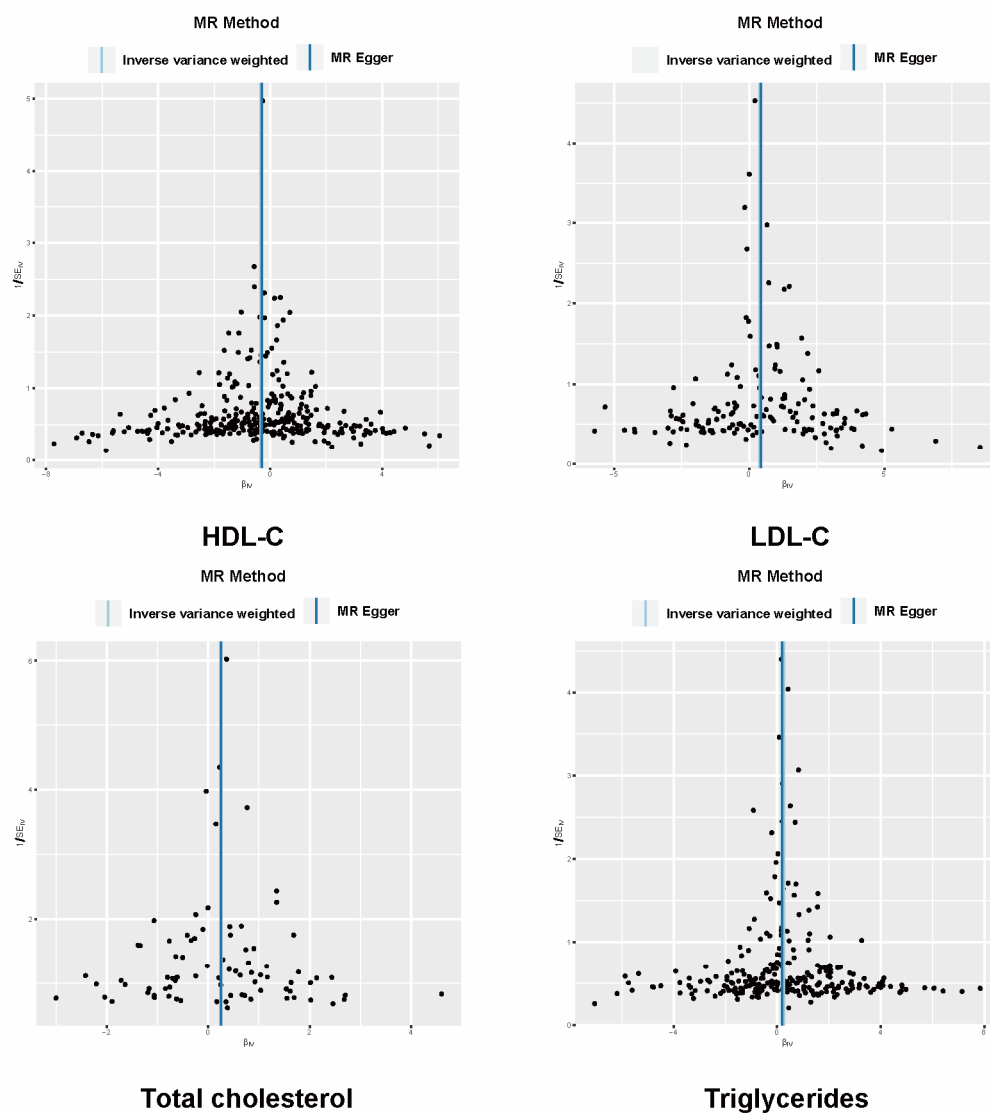

**Figure S2.** Funnel plots for the association of plasma lipids and the risk of aortic aneurysm.

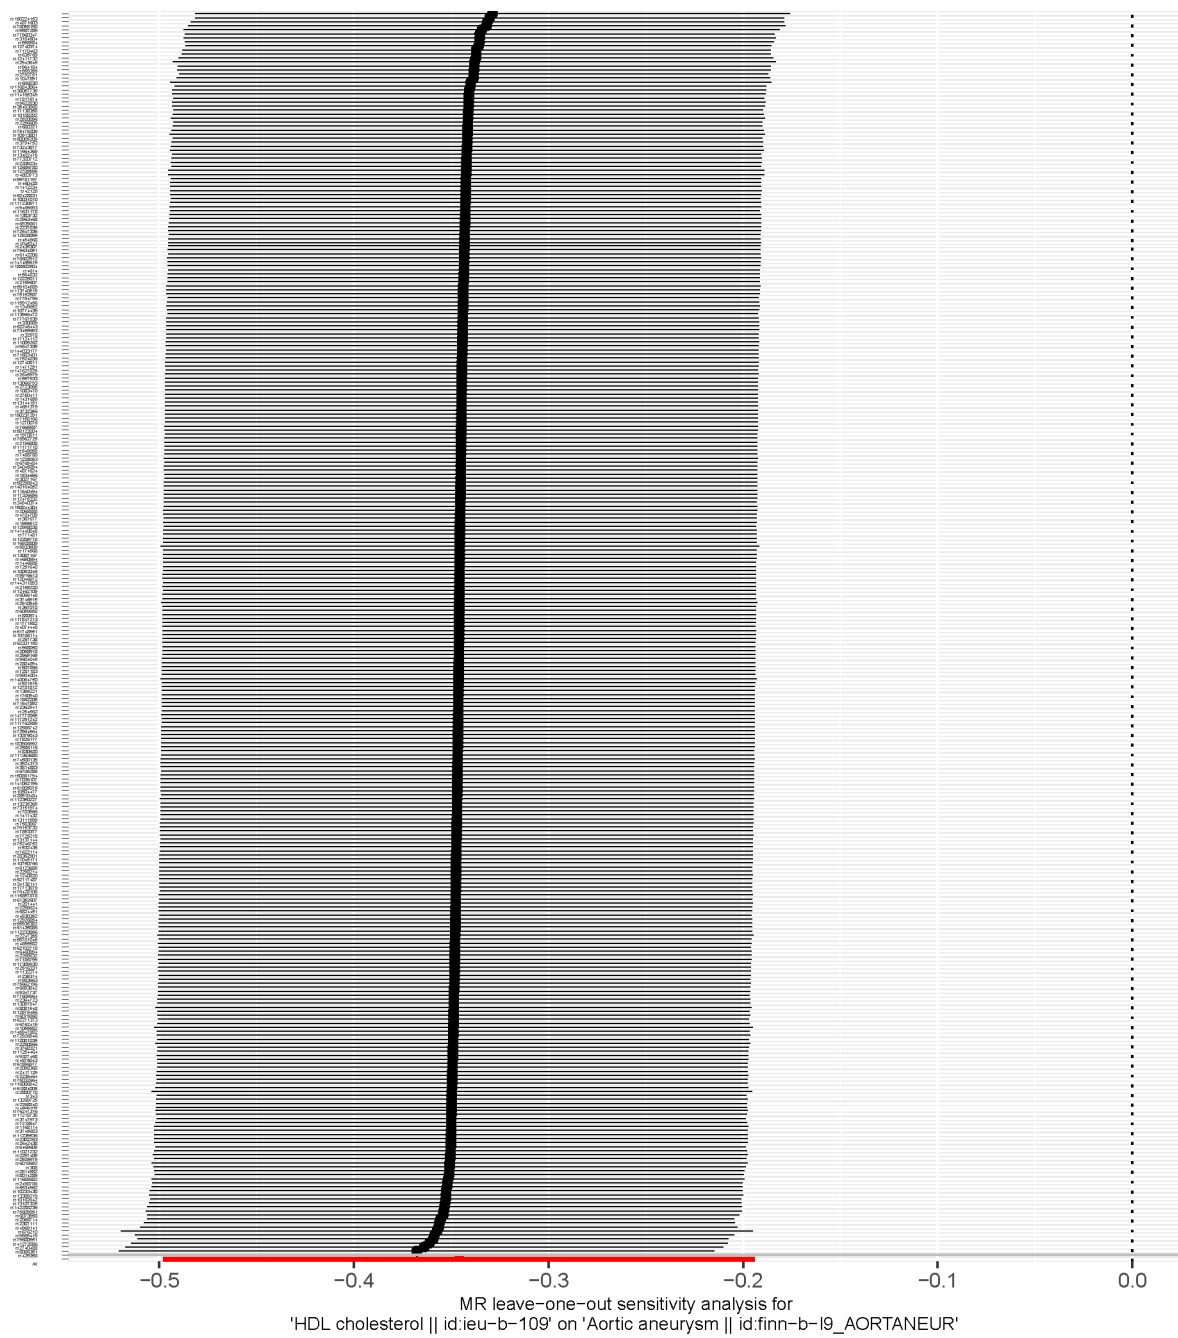

**Figure S3.** Leave-one-out analysis of the association between HDL-C and aortic aneurysm.

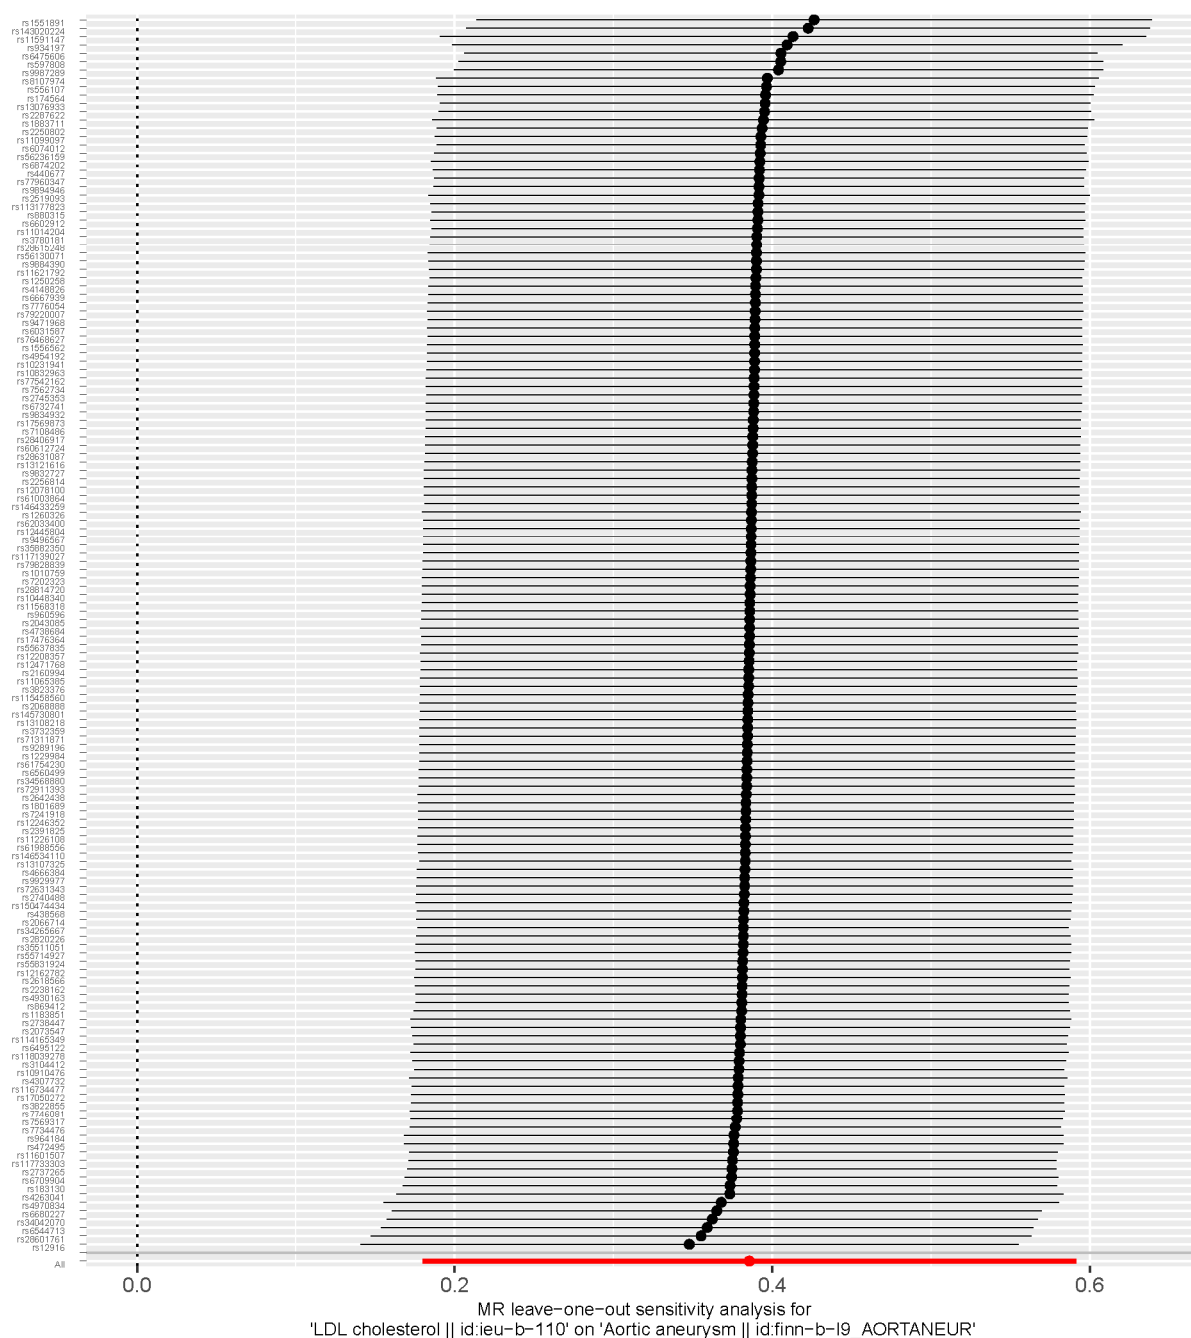

**Figure S4.** Leave-one-out analysis of the association between LDL-C and aortic aneurysm.

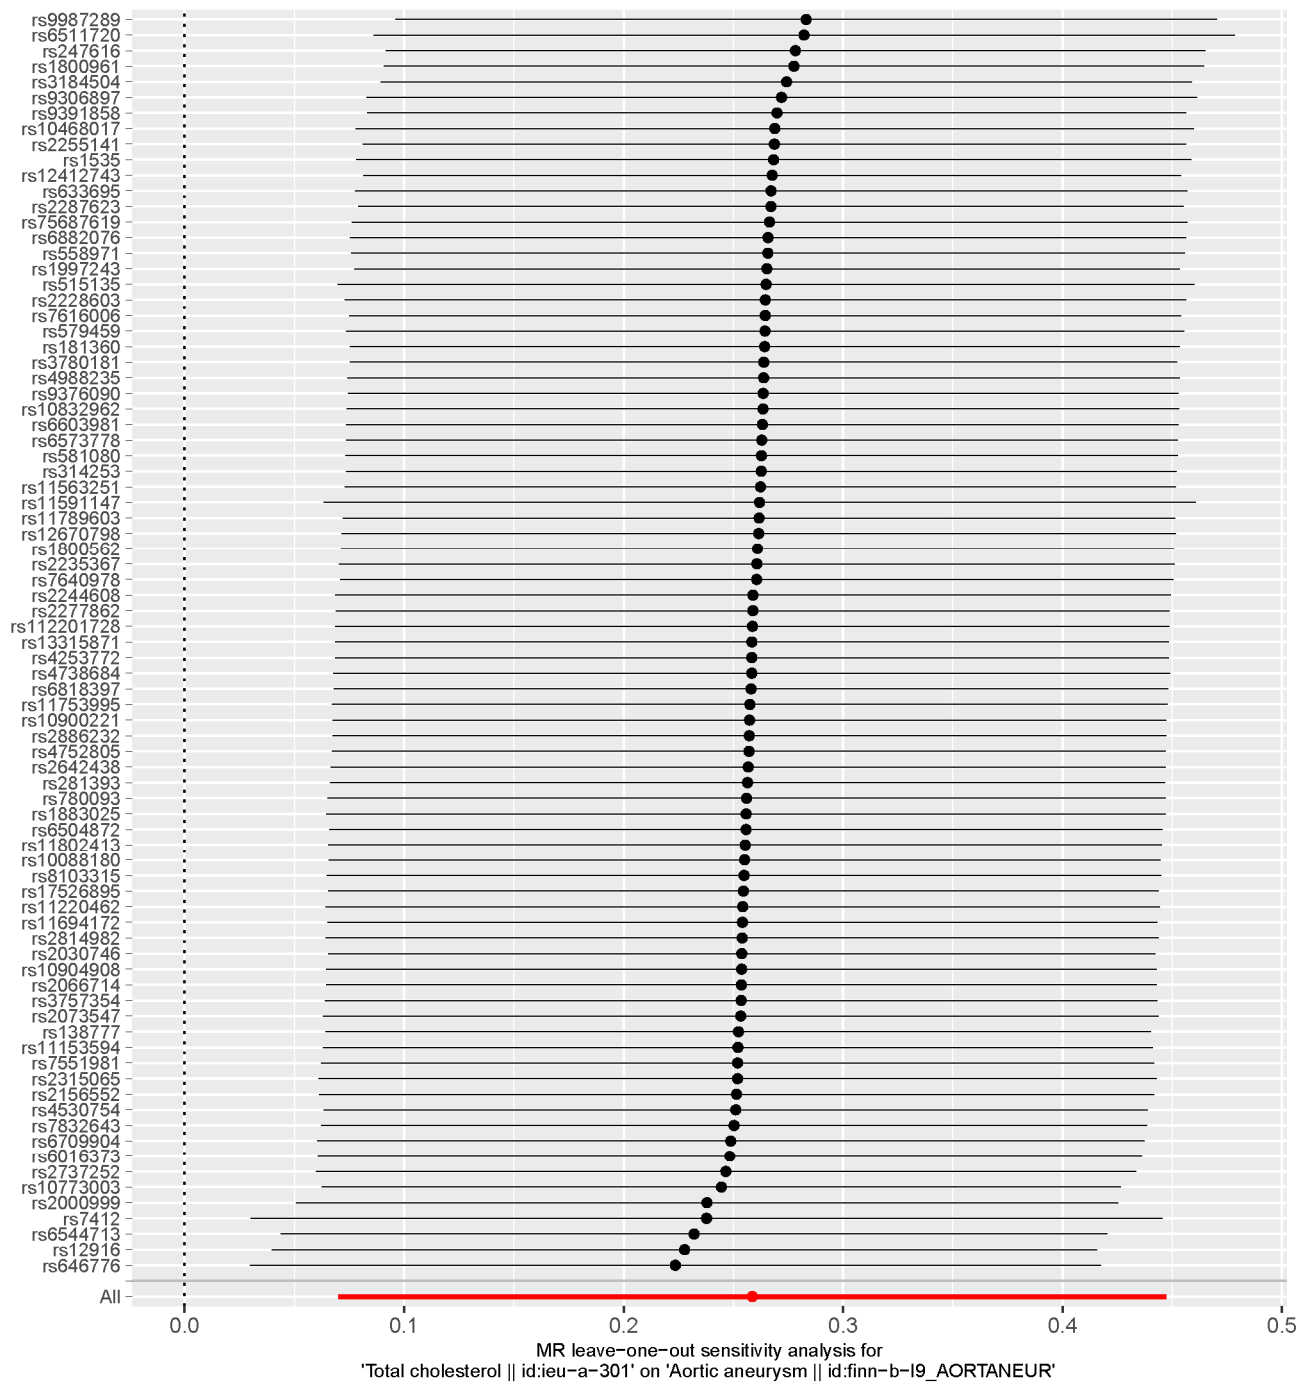

Figure S5. Leave-one-out analysis of the association between total cholesterol and aortic aneurysm.

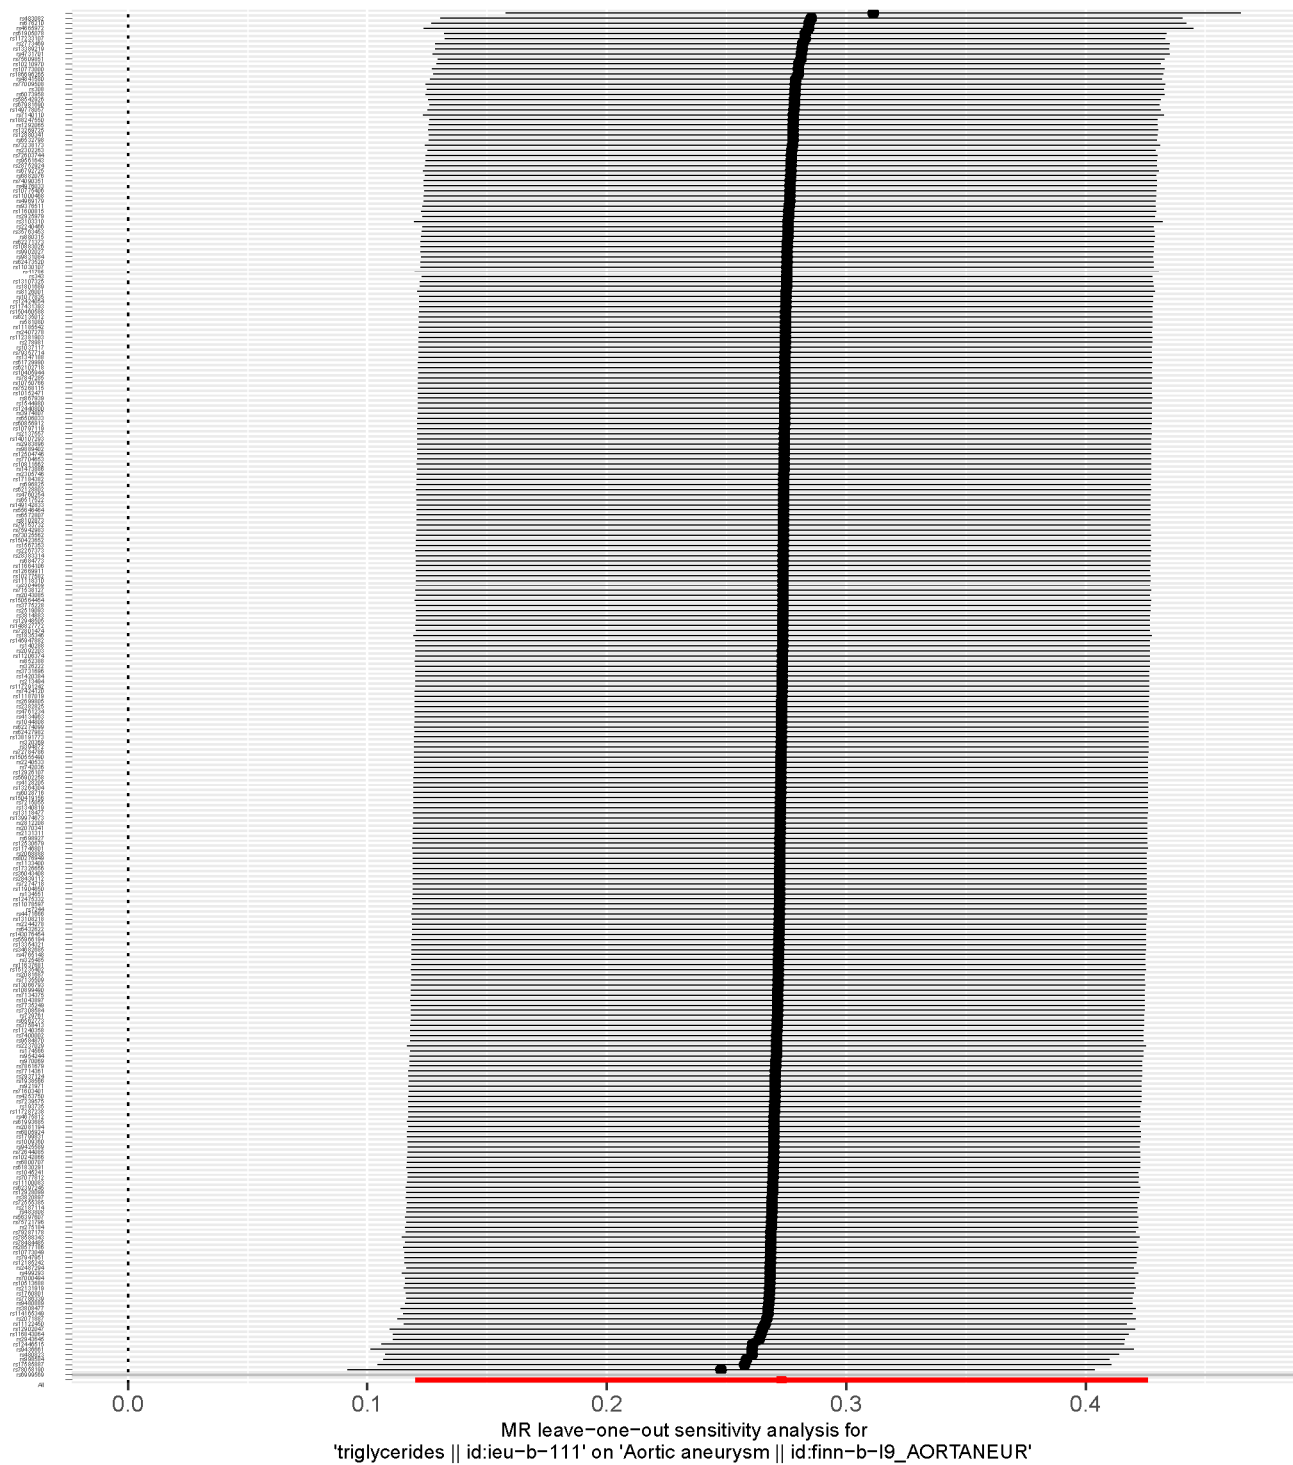

**Figure S6.** Leave-one-out analysis of the association between triglycerides and aortic aneurysm.

**Table S1.** SNPs of HDL-C extracted from UK Biobank with statistically significant threshold

| rsID        | A1 | A2 | BETA       | SE         | EAF      | p value   |
|-------------|----|----|------------|------------|----------|-----------|
| rs114165349 | C  | G  | -0.0810512 | 0.00636562 | 0.023124 | 3.90E-37  |
| rs3768321   | T  | G  | -0.0452296 | 0.00239482 | 0.196691 | 1.50E-79  |
| rs12045101  | T  | C  | -0.0145519 | 0.00222909 | 0.240857 | 6.70E-11  |
| rs2642438   | G  | A  | 0.0276562  | 0.00207854 | 0.702698 | 2.10E-40  |
| rs76962725  | A  | G  | -0.0277897 | 0.00508558 | 0.037253 | 4.60E-08  |
| rs185073199 | A  | T  | 0.0637585  | 0.0100718  | 0.010267 | 2.40E-10  |
| rs75246752  | C  | G  | 0.0491144  | 0.00841625 | 0.012897 | 5.40E-09  |
| rs1771582   | G  | T  | 0.0129458  | 0.00197832 | 0.557402 | 6.00E-11  |
| rs4650994   | A  | G  | -0.018056  | 0.00190061 | 0.531842 | 2.10E-21  |
| rs61805075  | A  | G  | -0.0257183 | 0.00202534 | 0.328694 | 6.00E-37  |
| rs141440048 | T  | C  | 0.0436872  | 0.00756751 | 0.017665 | 7.80E-09  |
| rs2298632   | T  | C  | 0.0144252  | 0.00193744 | 0.498073 | 9.70E-14  |
| rs771481    | A  | T  | 0.0288148  | 0.0024568  | 0.18382  | 9.10E-32  |
| rs3747973   | G  | A  | 0.0141665  | 0.00193802 | 0.592542 | 2.70E-13  |
| rs2298214   | A  | C  | -0.01241   | 0.00194099 | 0.577365 | 1.60E-10  |
| rs1168114   | G  | A  | 0.0155365  | 0.00199819 | 0.65237  | 7.50E-15  |
| rs6693842   | C  | T  | 0.013664   | 0.00199336 | 0.364844 | 7.10E-12  |
| rs61748951  | A  | C  | -0.0361204 | 0.00640878 | 0.024073 | 1.70E-08  |
| rs12740811  | G  | A  | -0.0184297 | 0.00326047 | 0.094047 | 1.60E-08  |
| rs2516331   | A  | C  | 0.0126835  | 0.00196658 | 0.375524 | 1.10E-10  |
| rs2281718   | T  | A  | 0.0596431  | 0.00195409 | 0.612575 | 1.00E-200 |
| rs12740374  | T  | G  | 0.0288629  | 0.00229106 | 0.221008 | 2.20E-36  |
| rs140584594 | G  | A  | 0.031071   | 0.00212905 | 0.729761 | 3.10E-48  |
| rs267738    | G  | T  | 0.0214529  | 0.00229757 | 0.219354 | 9.90E-21  |
| rs12046972  | C  | T  | -0.0148213 | 0.00191599 | 0.564083 | 1.00E-14  |
| rs557933    | C  | A  | 0.0152472  | 0.00190783 | 0.520349 | 1.30E-15  |
| rs676210    | A  | G  | 0.0592694  | 0.00235237 | 0.205227 | 4.50E-140 |
| rs7583067   | T  | C  | 0.0145946  | 0.00223535 | 0.240114 | 6.60E-11  |
| rs17713879  | A  | G  | 0.0138956  | 0.00197564 | 0.364695 | 2.00E-12  |
| rs13402475  | G  | C  | -0.0249227 | 0.00249807 | 0.815115 | 1.90E-23  |
| rs2362541   | G  | T  | -0.0108666 | 0.00190325 | 0.507519 | 1.10E-08  |
| rs13389219  | T  | C  | 0.0277324  | 0.00194608 | 0.392619 | 4.50E-46  |
| rs2364723   | C  | G  | 0.0120956  | 0.00204641 | 0.319156 | 3.40E-09  |
| rs12475332  | G  | T  | 0.012897   | 0.0021638  | 0.261038 | 2.50E-09  |
| rs907866    | A  | G  | -0.0183154 | 0.00191879 | 0.445487 | 1.40E-21  |
| rs2723065   | G  | A  | 0.0149623  | 0.00196239 | 0.376773 | 2.40E-14  |
| rs4599108   | T  | C  | 0.0136654  | 0.00192434 | 0.487654 | 1.20E-12  |
| rs1446585   | G  | A  | 0.0167827  | 0.00217146 | 0.244295 | 1.10E-14  |
| rs1083470   | A  | G  | 0.0115829  | 0.00195974 | 0.615717 | 3.40E-09  |
| rs12998038  | T  | C  | 0.0131918  | 0.0021847  | 0.258702 | 1.60E-09  |



|             |   |   |            |            |          |           |
|-------------|---|---|------------|------------|----------|-----------|
| rs12986742  | C | T | -0.0106002 | 0.00191315 | 0.475905 | 3.00E-08  |
| rs6705285   | T | G | 0.0115225  | 0.00191933 | 0.609068 | 1.90E-09  |
| rs2196808   | C | T | 0.0128638  | 0.00215716 | 0.731961 | 2.50E-09  |
| rs112350227 | T | C | -0.0319379 | 0.00582274 | 0.02764  | 4.10E-08  |
| rs59104589  | T | C | 0.0150155  | 0.0019816  | 0.358286 | 3.50E-14  |
| rs17326656  | T | G | -0.0223923 | 0.00223885 | 0.238666 | 1.50E-23  |
| rs11688682  | C | G | 0.0147369  | 0.0022133  | 0.270836 | 2.80E-11  |
| rs72926946  | A | C | -0.0206565 | 0.00208041 | 0.296376 | 3.10E-23  |
| rs1047891   | A | C | -0.0189073 | 0.00204367 | 0.315582 | 2.20E-20  |
| rs78058190  | A | G | -0.0783702 | 0.00490443 | 0.050415 | 1.80E-57  |
| rs2943645   | T | C | -0.0434706 | 0.00198833 | 0.646663 | 5.90E-106 |
| rs13097947  | C | T | 0.0159634  | 0.00203024 | 0.649315 | 3.80E-15  |
| rs62246443  | C | T | -0.0147841 | 0.00250895 | 0.174261 | 3.80E-09  |
| rs7622114   | A | C | 0.0115687  | 0.00193999 | 0.581017 | 2.50E-09  |
| rs2159607   | T | G | -0.0239454 | 0.00243213 | 0.810874 | 7.20E-23  |
| rs72964564  | C | A | -0.0125748 | 0.00220598 | 0.250244 | 1.20E-08  |
| rs6765484   | T | C | 0.0225207  | 0.00190864 | 0.472827 | 3.90E-32  |
| rs4855582   | T | C | 0.0111652  | 0.00192369 | 0.429621 | 6.50E-09  |
| rs1225053   | C | T | -0.0150376 | 0.00216684 | 0.264492 | 3.90E-12  |
| rs62271373  | A | T | -0.0406667 | 0.00408672 | 0.059972 | 2.50E-23  |
| rs13066793  | G | A | 0.0220769  | 0.00332887 | 0.090115 | 3.30E-11  |
| rs6762415   | G | T | -0.0108964 | 0.00191344 | 0.535292 | 1.20E-08  |
| rs77320712  | T | G | -0.0127407 | 0.0022658  | 0.235452 | 1.90E-08  |
| rs10513801  | G | T | -0.0303325 | 0.00277034 | 0.137151 | 6.70E-28  |
| rs13087167  | C | G | 0.0167458  | 0.00198206 | 0.632997 | 2.90E-17  |
| rs830620    | T | C | 0.0149538  | 0.00193085 | 0.415386 | 9.60E-15  |
| rs3732356   | T | G | -0.0299026 | 0.00386524 | 0.933782 | 1.00E-14  |
| rs9647335   | T | A | 0.0277595  | 0.00242471 | 0.191928 | 2.40E-30  |
| rs76247316  | C | T | -0.0113866 | 0.0019083  | 0.479856 | 2.40E-09  |
| rs2268840   | C | T | 0.0173197  | 0.00226775 | 0.22846  | 2.20E-14  |
| rs880674    | C | T | 0.0149836  | 0.00273775 | 0.142056 | 4.40E-08  |
| rs2237035   | T | G | 0.0139172  | 0.00195824 | 0.385886 | 1.20E-12  |
| rs1471251   | T | A | -0.0193662 | 0.00195327 | 0.398159 | 3.60E-23  |
| rs1383732   | G | A | -0.0152024 | 0.00267698 | 0.149969 | 1.40E-08  |
| rs10031010  | A | G | 0.0138083  | 0.00246597 | 0.184617 | 2.10E-08  |
| rs13137144  | A | G | 0.0164073  | 0.00192431 | 0.461454 | 1.50E-17  |
| rs71603401  | G | A | -0.0154721 | 0.00279889 | 0.136851 | 3.20E-08  |
| rs73243877  | G | A | -0.0253693 | 0.00254909 | 0.168086 | 2.50E-23  |
| rs2098918   | T | C | 0.0118698  | 0.00191595 | 0.45513  | 5.80E-10  |
| rs13111599  | G | A | 0.0127921  | 0.00216664 | 0.737196 | 3.50E-09  |
| rs1395221   | T | G | -0.0111888 | 0.00195359 | 0.397646 | 1.00E-08  |
| rs1055582   | T | C | 0.0140251  | 0.00190973 | 0.505231 | 2.10E-13  |

|             |   |   |            |            |          |           |
|-------------|---|---|------------|------------|----------|-----------|
| rs13107325  | T | C | -0.080346  | 0.00362445 | 0.074942 | 7.00E-109 |
| rs62331150  | T | G | -0.0129532 | 0.00236408 | 0.205141 | 4.30E-08  |
| rs13144151  | G | A | 0.0178695  | 0.00270341 | 0.850001 | 3.80E-11  |
| rs1349852   | C | A | 0.0112127  | 0.00192565 | 0.475293 | 5.80E-09  |
| rs6824451   | A | G | -0.0200444 | 0.00191167 | 0.464071 | 1.00E-25  |
| rs7665587   | C | T | 0.0139886  | 0.00193372 | 0.42208  | 4.70E-13  |
| rs4691379   | T | C | 0.0118717  | 0.00204326 | 0.318939 | 6.20E-09  |
| rs10053349  | C | T | 0.0120071  | 0.00195336 | 0.390258 | 7.90E-10  |
| rs2910949   | G | T | 0.0133996  | 0.00199892 | 0.354888 | 2.00E-11  |
| rs2307111   | C | T | 0.0190053  | 0.0019521  | 0.394924 | 2.10E-22  |
| rs2963468   | G | A | -0.0196653 | 0.00226256 | 0.235297 | 3.60E-18  |
| rs7725218   | A | G | -0.0122469 | 0.00201433 | 0.338422 | 1.20E-09  |
| rs1862205   | A | G | 0.0113186  | 0.00194381 | 0.404725 | 5.80E-09  |
| rs454968    | C | T | 0.0110337  | 0.00199469 | 0.644812 | 3.20E-08  |
| rs32578     | A | G | 0.0133235  | 0.00206513 | 0.309015 | 1.10E-10  |
| rs138354839 | A | C | -0.060325  | 0.00841064 | 0.015099 | 7.40E-13  |
| rs116006942 | A | G | -0.02987   | 0.00403491 | 0.060798 | 1.30E-13  |
| rs115912456 | G | A | 0.028084   | 0.0047884  | 0.041265 | 4.50E-09  |
| rs1045241   | T | C | 0.0164171  | 0.00215576 | 0.271252 | 2.60E-14  |
| rs9327468   | A | C | -0.0148994 | 0.00221907 | 0.755398 | 1.90E-11  |
| rs2339234   | A | G | -0.0118996 | 0.00205717 | 0.683004 | 7.30E-09  |
| rs188502504 | C | T | -0.0316669 | 0.00510538 | 0.03643  | 5.60E-10  |
| rs254562    | G | A | -0.0114752 | 0.00194192 | 0.409277 | 3.40E-09  |
| rs2814982   | T | C | -0.0275938 | 0.00314209 | 0.102216 | 1.60E-18  |
| rs6939861   | A | G | -0.0141972 | 0.00219368 | 0.261916 | 9.70E-11  |
| rs968050    | T | C | 0.0136601  | 0.00190807 | 0.48238  | 8.10E-13  |
| rs62428831  | C | T | 0.0178151  | 0.00275536 | 0.141547 | 1.00E-10  |
| rs1281959   | G | C | 0.0146574  | 0.00190666 | 0.525716 | 1.50E-14  |
| rs1240820   | A | G | 0.0131835  | 0.00210043 | 0.293164 | 3.50E-10  |
| rs36057735  | G | C | -0.0302136 | 0.00238679 | 0.199089 | 1.00E-36  |
| rs635769    | C | T | 0.0197069  | 0.00196961 | 0.628046 | 1.40E-23  |
| rs41272086  | A | G | -0.0567846 | 0.00310319 | 0.105505 | 8.50E-75  |
| rs9465693   | A | C | -0.0121004 | 0.00208231 | 0.304872 | 6.20E-09  |
| rs6934962   | T | C | 0.0161905  | 0.00194099 | 0.40151  | 7.30E-17  |
| rs2750411   | G | T | -0.0108405 | 0.0019091  | 0.4919   | 1.40E-08  |
| rs75479205  | G | A | 0.0138981  | 0.00243644 | 0.189496 | 1.20E-08  |
| rs28746806  | C | A | 0.0167023  | 0.00204471 | 0.333604 | 3.10E-16  |
| rs147627829 | A | G | -0.0535763 | 0.00468184 | 0.043706 | 2.50E-30  |
| rs12205778  | A | G | 0.0162321  | 0.00217549 | 0.258895 | 8.60E-14  |
| rs998584    | A | C | -0.0341901 | 0.00190975 | 0.482733 | 1.10E-71  |
| rs2800710   | C | T | -0.0202674 | 0.00190382 | 0.51821  | 1.80E-26  |
| rs9347737   | G | A | -0.0134784 | 0.00194715 | 0.428295 | 4.40E-12  |

|             |   |   |            |            |          |           |
|-------------|---|---|------------|------------|----------|-----------|
| rs6460894   | C | T | -0.0121653 | 0.00201452 | 0.339247 | 1.60E-09  |
| rs17138358  | C | G | -0.0272272 | 0.00194811 | 0.398392 | 2.20E-44  |
| rs201441    | G | T | -0.0109672 | 0.0019342  | 0.580679 | 1.40E-08  |
| rs10233430  | C | T | -0.0204944 | 0.00192772 | 0.427019 | 2.10E-26  |
| rs55935382  | A | C | 0.01764    | 0.00203822 | 0.32503  | 4.90E-18  |
| rs73151974  | T | C | -0.0161895 | 0.00273371 | 0.144024 | 3.20E-09  |
| rs1534696   | A | C | 0.0166573  | 0.0019113  | 0.540992 | 2.90E-18  |
| rs2098368   | T | C | -0.0116029 | 0.00192757 | 0.54591  | 1.80E-09  |
| rs35493868  | G | C | 0.0372262  | 0.00237772 | 0.202024 | 3.00E-55  |
| rs183906992 | C | T | 0.0294539  | 0.00474735 | 0.04275  | 5.50E-10  |
| rs77605964  | A | G | 0.0170396  | 0.00227819 | 0.226924 | 7.50E-14  |
| rs34940374  | A | G | -0.0170378 | 0.00247025 | 0.182973 | 5.30E-12  |
| rs13235365  | T | C | 0.0258181  | 0.00214379 | 0.273616 | 2.10E-33  |
| rs42125     | G | A | -0.0398667 | 0.0070049  | 0.023208 | 1.30E-08  |
| rs12705595  | A | G | 0.0110554  | 0.00198306 | 0.37337  | 2.50E-08  |
| rs7794796   | T | C | -0.016879  | 0.00203772 | 0.332335 | 1.20E-16  |
| rs9987289   | G | A | 0.0872902  | 0.00329366 | 0.908737 | 9.10E-155 |
| rs75609851  | A | G | 0.170089   | 0.00964674 | 0.010454 | 1.40E-69  |
| rs140064750 | C | T | -0.0440664 | 0.00634192 | 0.024546 | 3.70E-12  |
| rs75662196  | C | G | 0.0678721  | 0.00587239 | 0.027941 | 6.70E-31  |
| rs61596977  | T | C | -0.016225  | 0.00273721 | 0.140363 | 3.10E-09  |
| rs2290866   | T | C | -0.0119226 | 0.00218189 | 0.253153 | 4.60E-08  |
| rs7817574   | C | T | 0.0331985  | 0.00243942 | 0.185003 | 3.50E-42  |
| rs330089    | C | T | 0.0204692  | 0.00318925 | 0.098081 | 1.40E-10  |
| rs79153732  | T | C | -0.0939759 | 0.00728238 | 0.017377 | 4.20E-38  |
| rs10504477  | C | T | -0.0150661 | 0.00193097 | 0.412192 | 6.10E-15  |
| rs2247355   | T | C | 0.0206138  | 0.00245873 | 0.182679 | 5.10E-17  |
| rs6469605   | T | C | 0.0316197  | 0.00191959 | 0.568501 | 5.80E-61  |
| rs343       | A | C | 0.133778   | 0.00346421 | 0.08307  | 1.00E-200 |
| rs308       | G | T | 0.12651    | 0.00669305 | 0.020639 | 1.10E-79  |
| rs13269725  | G | A | -0.0259912 | 0.00353253 | 0.078342 | 1.90E-13  |
| rs1431659   | G | A | 0.0127918  | 0.00214104 | 0.728463 | 2.30E-09  |
| rs4871603   | T | C | 0.0360061  | 0.00199228 | 0.653471 | 5.20E-73  |
| rs61435086  | C | T | 0.089343   | 0.00862169 | 0.012312 | 3.70E-25  |
| rs7826177   | C | T | 0.0112399  | 0.00197917 | 0.635428 | 1.40E-08  |
| rs72647336  | A | G | -0.0440494 | 0.00442834 | 0.056628 | 2.60E-23  |
| rs4875043   | C | A | -0.0149745 | 0.0023285  | 0.216821 | 1.30E-10  |
| rs10108282  | A | T | 0.0168525  | 0.00234262 | 0.205724 | 6.30E-13  |
| rs75032664  | G | C | -0.0551041 | 0.00908791 | 0.012909 | 1.30E-09  |
| rs142288236 | T | C | -0.0776969 | 0.00795635 | 0.01469  | 1.60E-22  |
| rs80005209  | G | T | -0.144197  | 0.00563687 | 0.029614 | 2.50E-144 |
| rs4871624   | G | T | -0.020416  | 0.00211032 | 0.286726 | 3.90E-22  |

|             |   |   |            |            |          |           |
|-------------|---|---|------------|------------|----------|-----------|
| rs2297409   | A | G | -0.0333565 | 0.00240571 | 0.194635 | 1.00E-43  |
| rs1125873   | T | A | 0.0159741  | 0.00192237 | 0.492135 | 9.60E-17  |
| rs10119644  | A | T | 0.013468   | 0.00191042 | 0.493902 | 1.80E-12  |
| rs1411432   | C | A | -0.0139757 | 0.00245569 | 0.186415 | 1.30E-08  |
| rs74500135  | C | T | 0.0670758  | 0.010029   | 0.009847 | 2.30E-11  |
| rs1412234   | C | T | -0.011989  | 0.00203583 | 0.327133 | 3.90E-09  |
| rs7853377   | G | A | 0.0152447  | 0.0023168  | 0.216224 | 4.70E-11  |
| rs2417125   | G | A | -0.0131524 | 0.00211658 | 0.284014 | 5.20E-10  |
| rs532436    | A | G | 0.0231547  | 0.00245365 | 0.184606 | 3.80E-21  |
| rs2520096   | G | A | 0.0147205  | 0.00215114 | 0.270192 | 7.70E-12  |
| rs7036107   | G | A | -0.0122524 | 0.00194377 | 0.51098  | 2.90E-10  |
| rs12686780  | T | C | -0.0161688 | 0.00251034 | 0.174998 | 1.20E-10  |
| rs2740488   | C | A | -0.0686515 | 0.00216181 | 0.265328 | 1.00E-200 |
| rs147772065 | C | G | 0.0288034  | 0.0052496  | 0.034794 | 4.10E-08  |
| rs686030    | A | C | 0.0498241  | 0.00273951 | 0.858823 | 6.50E-74  |
| rs2066714   | C | T | 0.0465396  | 0.00284369 | 0.128622 | 3.40E-60  |
| rs11254464  | C | T | 0.0127581  | 0.00193081 | 0.423107 | 3.90E-11  |
| rs34045894  | A | G | -0.0172909 | 0.00262706 | 0.15624  | 4.60E-11  |
| rs2804894   | A | G | 0.0173063  | 0.0021841  | 0.734831 | 2.30E-15  |
| rs7924036   | T | G | 0.0138679  | 0.00190752 | 0.503377 | 3.60E-13  |
| rs703966    | A | G | 0.0156949  | 0.00193455 | 0.418881 | 4.90E-16  |
| rs1970811   | C | T | -0.0116112 | 0.00191759 | 0.457743 | 1.40E-09  |
| rs11009262  | T | G | -0.0233289 | 0.00409245 | 0.057318 | 1.20E-08  |
| rs11239536  | A | T | 0.0287501  | 0.00223129 | 0.240967 | 5.50E-38  |
| rs2068888   | A | G | 0.0191803  | 0.0019152  | 0.450441 | 1.30E-23  |
| rs10786114  | T | C | 0.0238735  | 0.00288231 | 0.874851 | 1.20E-16  |
| rs2792751   | C | T | -0.0360998 | 0.0021336  | 0.725031 | 3.20E-64  |
| rs12781812  | T | G | 0.0107203  | 0.00194289 | 0.400915 | 3.40E-08  |
| rs12411732  | A | G | -0.0305779 | 0.00274115 | 0.145572 | 6.80E-29  |
| rs61884005  | G | C | 0.0163406  | 0.00293002 | 0.121445 | 2.40E-08  |
| rs559355    | T | A | -0.0349311 | 0.00261254 | 0.1573   | 9.00E-41  |
| rs117847213 | G | A | 0.0295589  | 0.0048659  | 0.040812 | 1.20E-09  |
| rs59781045  | T | C | 0.074037   | 0.0037879  | 0.068117 | 4.50E-85  |
| rs17309930  | A | C | -0.0218885 | 0.00235533 | 0.205132 | 1.50E-20  |
| rs2302263   | T | C | -0.0364373 | 0.00335268 | 0.088695 | 1.60E-27  |
| rs11021232  | C | T | -0.0167378 | 0.00248678 | 0.18096  | 1.70E-11  |
| rs964184    | C | G | 0.10544    | 0.00279456 | 0.866364 | 1.00E-200 |
| rs141469619 | G | A | -0.203479  | 0.0101857  | 0.009879 | 8.70E-89  |
| rs4614      | G | A | -0.0178217 | 0.00193829 | 0.406222 | 3.80E-20  |
| rs16928809  | A | G | -0.0262633 | 0.00329991 | 0.093089 | 1.70E-15  |
| rs12575456  | A | G | 0.0445866  | 0.00203342 | 0.321829 | 1.40E-106 |
| rs117762989 | T | C | -0.0268923 | 0.00468314 | 0.043022 | 9.30E-09  |

|             |   |   |            |            |          |           |
|-------------|---|---|------------|------------|----------|-----------|
| rs4930352   | T | G | 0.0161709  | 0.00193852 | 0.494128 | 7.30E-17  |
| rs117291242 | T | C | -0.0315912 | 0.00506695 | 0.036567 | 4.50E-10  |
| rs79634051  | C | G | 0.0392148  | 0.00574877 | 0.028177 | 9.00E-12  |
| rs564832    | C | T | -0.011708  | 0.00205455 | 0.315005 | 1.20E-08  |
| rs10750766  | A | C | -0.0185663 | 0.00209928 | 0.709866 | 9.20E-19  |
| rs2155220   | T | C | -0.0105204 | 0.00191315 | 0.437951 | 3.80E-08  |
| rs11218738  | A | G | 0.0234498  | 0.00219817 | 0.249489 | 1.40E-26  |
| rs174566    | G | A | -0.0562241 | 0.00199551 | 0.350061 | 1.20E-174 |
| rs10774439  | A | G | 0.020513   | 0.00248318 | 0.814891 | 1.40E-16  |
| rs11045171  | G | A | 0.0283661  | 0.00240558 | 0.197605 | 4.30E-32  |
| rs7316878   | C | T | 0.0115056  | 0.00201679 | 0.43366  | 1.20E-08  |
| rs2645979   | A | G | 0.0114281  | 0.00198606 | 0.357369 | 8.70E-09  |
| rs12229011  | T | C | -0.0259933 | 0.00322614 | 0.097467 | 7.80E-16  |
| rs7488780   | C | G | 0.0145459  | 0.00237104 | 0.204263 | 8.50E-10  |
| rs58298943  | T | C | 0.0201986  | 0.00342748 | 0.084318 | 3.80E-09  |
| rs61352607  | T | G | 0.0306111  | 0.00222442 | 0.240851 | 4.40E-43  |
| rs3184504   | C | T | 0.0265387  | 0.00190452 | 0.517322 | 3.90E-44  |
| rs3924313   | A | G | -0.0239168 | 0.00204761 | 0.322221 | 1.60E-31  |
| rs58123204  | G | A | -0.0184574 | 0.00264401 | 0.153445 | 2.90E-12  |
| rs921919    | A | G | -0.041665  | 0.00206455 | 0.669162 | 1.40E-90  |
| rs113740515 | A | G | 0.0377752  | 0.00233951 | 0.209452 | 1.20E-58  |
| rs11171710  | A | G | -0.0114694 | 0.00192933 | 0.44814  | 2.80E-09  |
| rs111363680 | T | C | 0.0328171  | 0.00592877 | 0.031354 | 3.10E-08  |
| rs9604045   | T | G | 0.0175151  | 0.00228914 | 0.253572 | 2.00E-14  |
| rs150861794 | T | C | -0.0446978 | 0.00759758 | 0.018301 | 4.00E-09  |
| rs76428106  | C | T | -0.0624148 | 0.00878921 | 0.01297  | 1.20E-12  |
| rs117230571 | G | A | -0.0266417 | 0.00363105 | 0.076958 | 2.20E-13  |
| rs549058    | T | G | 0.0171095  | 0.00293694 | 0.120319 | 5.70E-09  |
| rs367677    | G | A | 0.0166703  | 0.00224786 | 0.239995 | 1.20E-13  |
| rs8014289   | G | A | 0.0151048  | 0.00192712 | 0.562282 | 4.60E-15  |
| rs17124112  | A | C | -0.020798  | 0.00352939 | 0.07993  | 3.80E-09  |
| rs1760940   | C | A | 0.0121791  | 0.0022157  | 0.24702  | 3.90E-08  |
| rs4899251   | T | C | -0.0232048 | 0.0041399  | 0.942012 | 2.10E-08  |
| rs7158166   | C | T | 0.0140932  | 0.00195101 | 0.593856 | 5.10E-13  |
| rs1955512   | A | G | 0.0109986  | 0.00197003 | 0.575802 | 2.40E-08  |
| rs13379043  | C | T | 0.0198764  | 0.00216717 | 0.28042  | 4.70E-20  |
| rs2498786   | G | C | -0.0254741 | 0.00196826 | 0.615979 | 2.60E-38  |
| rs10162642  | A | G | -0.0479223 | 0.0023419  | 0.211684 | 4.60E-93  |
| rs1270076   | G | A | 0.014345   | 0.00228637 | 0.776823 | 3.50E-10  |
| rs4074448   | A | G | 0.015131   | 0.00196355 | 0.589254 | 1.30E-14  |
| rs7170463   | G | A | 0.018911   | 0.0020591  | 0.311432 | 4.20E-20  |
| rs150844304 | C | A | -0.090543  | 0.00599215 | 0.025907 | 1.40E-51  |

|             |   |   |            |            |          |           |
|-------------|---|---|------------|------------|----------|-----------|
| rs11631178  | C | T | 0.0211366  | 0.0031235  | 0.103811 | 1.30E-11  |
| rs28362901  | A | C | -0.0238891 | 0.00336295 | 0.088332 | 1.20E-12  |
| rs28510484  | C | G | -0.0154472 | 0.00253932 | 0.170462 | 1.20E-09  |
| rs3814883   | T | C | -0.0153035 | 0.00189151 | 0.482467 | 5.90E-16  |
| rs4784709   | A | T | -0.0747244 | 0.00477284 | 0.959159 | 3.00E-55  |
| rs112233856 | G | A | -0.0528133 | 0.00579493 | 0.028541 | 8.00E-20  |
| rs55781197  | G | A | 0.0587349  | 0.00295144 | 0.115034 | 4.00E-88  |
| rs12928099  | A | C | 0.0214263  | 0.00206787 | 0.29612  | 3.70E-25  |
| rs113966472 | A | G | 0.0324769  | 0.00554864 | 0.032408 | 4.80E-09  |
| rs7186799   | C | A | -0.0220239 | 0.00190185 | 0.437388 | 5.20E-31  |
| rs71647892  | C | T | -0.0629378 | 0.00871711 | 0.011842 | 5.20E-13  |
| rs2925979   | C | T | 0.037299   | 0.00205659 | 0.699999 | 1.60E-73  |
| rs9933509   | C | T | -0.0140121 | 0.00191313 | 0.413899 | 2.40E-13  |
| rs75152587  | T | G | -0.0944291 | 0.00849948 | 0.012738 | 1.10E-28  |
| rs9989419   | G | A | 0.143765   | 0.00192633 | 0.605917 | 1.00E-200 |
| rs140164052 | A | G | -0.0417453 | 0.00540785 | 0.031786 | 1.20E-14  |
| rs12926854  | G | A | 0.0122457  | 0.00213341 | 0.269909 | 9.50E-09  |
| rs11640494  | A | G | -0.015349  | 0.00189969 | 0.456655 | 6.50E-16  |
| rs79600951  | G | C | -0.106795  | 0.00325908 | 0.092057 | 1.00E-200 |
| rs116857878 | T | C | 0.0482826  | 0.00697677 | 0.020363 | 4.50E-12  |
| rs9916613   | A | T | -0.0133119 | 0.00199143 | 0.356493 | 2.30E-11  |
| rs34138141  | T | G | -0.0175318 | 0.00212461 | 0.280655 | 1.60E-16  |
| rs145947882 | C | A | -0.164935  | 0.00609907 | 0.026042 | 4.70E-161 |
| rs112001035 | A | G | -0.0466304 | 0.00408312 | 0.060492 | 3.30E-30  |
| rs7218647   | A | G | 0.0109209  | 0.00192614 | 0.559041 | 1.40E-08  |
| rs141062196 | A | G | -0.0188553 | 0.00241089 | 0.194436 | 5.20E-15  |
| rs4969141   | T | C | 0.0296373  | 0.00191152 | 0.489676 | 3.20E-54  |
| rs3027167   | T | C | -0.0124258 | 0.00205083 | 0.682038 | 1.40E-09  |
| rs9904004   | G | A | -0.0302694 | 0.00400552 | 0.060744 | 4.10E-14  |
| rs2586116   | G | C | -0.0162577 | 0.00217179 | 0.259435 | 7.10E-14  |
| rs3794752   | C | T | 0.0128326  | 0.00213876 | 0.280634 | 2.00E-09  |
| rs8081548   | A | T | 0.01845    | 0.00202095 | 0.658521 | 6.90E-20  |
| rs56017932  | C | G | 0.015477   | 0.00268496 | 0.20048  | 8.20E-09  |
| rs73455693  | A | G | 0.0280646  | 0.00510538 | 0.037231 | 3.90E-08  |
| rs2435307   | T | C | 0.0162767  | 0.00190927 | 0.48634  | 1.50E-17  |
| rs77960347  | G | A | 0.290966   | 0.00830188 | 0.013349 | 1.00E-200 |
| rs8086351   | G | C | 0.0839587  | 0.0025068  | 0.824212 | 1.00E-200 |
| rs11664369  | T | C | -0.0229777 | 0.00215861 | 0.267061 | 1.80E-26  |
| rs983663    | G | A | -0.0143608 | 0.0022075  | 0.251682 | 7.70E-11  |
| rs150237291 | C | T | 0.0453058  | 0.00656295 | 0.021799 | 5.10E-12  |
| rs680321    | C | T | 0.0108517  | 0.00191658 | 0.456556 | 1.50E-08  |
| rs2298624   | T | C | 0.0300361  | 0.00280916 | 0.132532 | 1.10E-26  |

|             |   |   |            |            |          |           |
|-------------|---|---|------------|------------|----------|-----------|
| rs3745683   | A | G | -0.0546353 | 0.00362928 | 0.074638 | 3.20E-51  |
| rs429358    | C | T | -0.0756554 | 0.00263871 | 0.154325 | 8.71E-181 |
| rs12462109  | T | C | -0.0159539 | 0.00210812 | 0.287067 | 3.80E-14  |
| rs367070    | G | A | 0.0417949  | 0.00228709 | 0.225571 | 1.30E-74  |
| rs554146    | C | A | 0.0127257  | 0.00211531 | 0.704992 | 1.80E-09  |
| rs62117487  | G | A | 0.0457487  | 0.00411744 | 0.057038 | 1.10E-28  |
| rs116843064 | A | G | 0.206178   | 0.0069176  | 0.019327 | 3.40E-195 |
| rs62102718  | T | A | -0.0236953 | 0.0021125  | 0.286413 | 3.40E-29  |
| rs4803773   | G | A | 0.0400846  | 0.00199508 | 0.498722 | 8.70E-90  |
| rs7251640   | C | T | 0.0141902  | 0.00242811 | 0.194019 | 5.10E-09  |
| rs2965169   | C | A | 0.0120831  | 0.00195448 | 0.388738 | 6.30E-10  |
| rs144311893 | T | C | 0.0809615  | 0.0066916  | 0.022086 | 1.10E-33  |
| rs1132274   | A | C | -0.0217809 | 0.00263979 | 0.154029 | 1.60E-16  |
| rs6018652   | A | G | 0.0259271  | 0.0023605  | 0.792888 | 4.60E-28  |
| rs6123685   | A | G | 0.0159783  | 0.0021911  | 0.254745 | 3.00E-13  |
| rs144033177 | C | A | -0.05557   | 0.0078389  | 0.015822 | 1.40E-12  |
| rs150224153 | T | C | -0.0934689 | 0.00575879 | 0.029665 | 3.10E-59  |
| rs77767539  | A | G | 0.0452639  | 0.00821382 | 0.014299 | 3.60E-08  |
| rs6066148   | C | G | 0.0133124  | 0.00218121 | 0.259964 | 1.00E-09  |
| rs6059958   | T | C | 0.0146541  | 0.00255516 | 0.170742 | 9.70E-09  |
| rs6142206   | A | G | -0.0161106 | 0.00193468 | 0.42072  | 8.30E-17  |
| rs6073958   | C | T | -0.0609299 | 0.00239207 | 0.198804 | 4.10E-143 |
| rs6075860   | A | G | -0.0128    | 0.00192763 | 0.56549  | 3.10E-11  |
| rs76602912  | C | T | -0.0434476 | 0.00626364 | 0.023789 | 4.00E-12  |
| rs407133    | C | G | -0.0105618 | 0.00193239 | 0.558791 | 4.60E-08  |
| rs235314    | T | C | -0.0177425 | 0.00191993 | 0.532212 | 2.40E-20  |
| rs7281183   | A | G | -0.01272   | 0.00218963 | 0.737142 | 6.30E-09  |
| rs2236464   | C | T | -0.0155836 | 0.00235595 | 0.212102 | 3.70E-11  |
| rs3746915   | G | A | 0.0108813  | 0.00194098 | 0.580939 | 2.10E-08  |
| rs2256609   | G | A | -0.0328881 | 0.00244058 | 0.189238 | 2.20E-41  |
| rs133015    | G | C | 0.0205993  | 0.00192854 | 0.440063 | 1.20E-26  |
| rs9622830   | G | C | -0.0163821 | 0.00199965 | 0.354212 | 2.60E-16  |
| rs460428    | C | T | -0.0143462 | 0.00226779 | 0.230673 | 2.50E-10  |

A1: Effect Allele; A2: Alternative Allele; EAF: Effect Allele Frequency; Beta: beta coefficient; SE: Standard error of beta coefficient; *p*: *p*-value of the meta-analysis

**Table S2.** SNPs of LDL-C extracted from UK Biobank with statistically significant threshold

| rsID        | A1 | A2 | BETA       | SE         | EAF      | <i>p</i> value |
|-------------|----|----|------------|------------|----------|----------------|
| rs115458560 | C  | T  | -0.0503391 | 0.0077049  | 0.018563 | 6.40E-11       |
| rs6667939   | T  | C  | 0.0153061  | 0.00232969 | 0.71867  | 5.00E-11       |
| rs12078100  | G  | C  | 0.0131127  | 0.00214876 | 0.623087 | 1.00E-09       |
| rs114165349 | C  | G  | 0.056229   | 0.00695521 | 0.023172 | 6.20E-16       |

|             |   |   |            |            |          |           |
|-------------|---|---|------------|------------|----------|-----------|
| rs140584594 | G | A | -0.01433   | 0.00232961 | 0.730069 | 7.70E-10  |
| rs1183851   | C | T | 0.024377   | 0.00213943 | 0.395544 | 4.50E-30  |
| rs6680227   | A | G | -0.0746581 | 0.00563322 | 0.035237 | 4.30E-40  |
| rs2642438   | G | A | 0.0253218  | 0.00227308 | 0.702657 | 8.00E-29  |
| rs28631087  | C | T | -0.0161901 | 0.0025459  | 0.21274  | 2.00E-10  |
| rs880315    | C | T | -0.0152225 | 0.00220678 | 0.34024  | 5.30E-12  |
| rs55637835  | T | C | -0.0187129 | 0.00324835 | 0.120881 | 8.40E-09  |
| rs11591147  | T | G | -0.348456  | 0.00793088 | 0.017468 | 1.00E-200 |
| rs472495    | T | G | 0.0425743  | 0.00218093 | 0.648959 | 7.30E-85  |
| rs4970834   | T | C | -0.105303  | 0.00268179 | 0.186642 | 1.00E-200 |
| rs556107    | T | C | 0.0351712  | 0.00208846 | 0.523338 | 1.20E-63  |
| rs1556562   | T | G | 0.0190249  | 0.00248903 | 0.790033 | 2.10E-14  |
| rs10910476  | T | C | 0.0123938  | 0.00210193 | 0.555163 | 3.70E-09  |
| rs12471768  | C | T | 0.0135999  | 0.00228112 | 0.704119 | 2.50E-09  |
| rs6732741   | A | T | -0.0280985 | 0.00322423 | 0.119324 | 2.90E-18  |
| rs6709904   | G | A | -0.043441  | 0.00329601 | 0.112585 | 1.10E-39  |
| rs4666384   | G | A | -0.016633  | 0.00224003 | 0.678914 | 1.10E-13  |
| rs934197    | A | G | 0.0832348  | 0.00220298 | 0.33544  | 1.00E-200 |
| rs7562734   | C | G | -0.0201126 | 0.00222879 | 0.322299 | 1.80E-19  |
| rs150474434 | A | G | -0.0347623 | 0.00347063 | 0.101353 | 1.30E-23  |
| rs17050272  | A | G | -0.0205597 | 0.00211549 | 0.409275 | 2.50E-22  |
| rs7569317   | C | T | 0.017881   | 0.00208232 | 0.530638 | 8.90E-18  |
| rs56236159  | G | T | 0.0177139  | 0.00307979 | 0.13149  | 8.80E-09  |
| rs4954192   | T | C | 0.0146629  | 0.00213654 | 0.373474 | 6.70E-12  |
| rs2287622   | G | A | -0.0211572 | 0.00212931 | 0.602794 | 2.90E-23  |
| rs1250258   | T | C | 0.0137745  | 0.00236771 | 0.736649 | 6.00E-09  |
| rs11568318  | A | C | 0.0256951  | 0.00417849 | 0.066246 | 7.80E-10  |
| rs1260326   | C | T | -0.0347299 | 0.00212546 | 0.604443 | 5.10E-60  |
| rs6544713   | C | T | -0.0537152 | 0.00222274 | 0.676864 | 5.00E-129 |
| rs13076933  | G | T | -0.020994  | 0.00239027 | 0.259454 | 1.60E-18  |
| rs9832727   | G | C | -0.0147604 | 0.00220388 | 0.339636 | 2.10E-11  |
| rs9834932   | G | A | -0.0322172 | 0.00366408 | 0.08883  | 1.50E-18  |
| rs71311871  | G | A | -0.0283073 | 0.00378458 | 0.083052 | 7.50E-14  |
| rs9289196   | C | T | 0.0173702  | 0.00275673 | 0.173786 | 3.00E-10  |
| rs113177823 | A | G | -0.0411737 | 0.00466039 | 0.054136 | 1.00E-18  |
| rs3732359   | A | G | -0.0173556 | 0.00252038 | 0.78012  | 5.70E-12  |
| rs13121616  | G | A | 0.0128507  | 0.00226135 | 0.693553 | 1.30E-08  |
| rs9884390   | C | T | 0.0251489  | 0.00249163 | 0.234121 | 5.90E-24  |
| rs1229984   | C | T | 0.0525797  | 0.00633356 | 0.972799 | 1.00E-16  |
| rs990619    | G | C | -0.0118015 | 0.00208525 | 0.523638 | 1.50E-08  |
| rs13108218  | G | A | -0.0177871 | 0.0021598  | 0.614867 | 1.80E-16  |
| rs11099097  | T | C | -0.0181876 | 0.00230231 | 0.291333 | 2.80E-15  |



|             |   |   |            |            |          |           |
|-------------|---|---|------------|------------|----------|-----------|
| rs13107325  | T | C | -0.0248331 | 0.00396439 | 0.074895 | 3.80E-10  |
| rs12916     | C | T | 0.0621175  | 0.00212705 | 0.400537 | 1.70E-187 |
| rs146433259 | T | C | -0.0569699 | 0.0103828  | 0.011736 | 4.10E-08  |
| rs28590710  | A | G | -0.017618  | 0.00274759 | 0.196791 | 1.40E-10  |
| rs7734476   | A | G | 0.0187595  | 0.00209401 | 0.550077 | 3.30E-19  |
| rs6874202   | C | T | 0.032331   | 0.00216292 | 0.634269 | 1.60E-50  |
| rs116734477 | T | C | -0.0473368 | 0.0052819  | 0.040837 | 3.20E-19  |
| rs3104412   | G | A | -0.0189061 | 0.00209423 | 0.451531 | 1.80E-19  |
| rs2745353   | T | C | 0.0126963  | 0.00208336 | 0.5181   | 1.10E-09  |
| rs7776054   | G | A | -0.0162316 | 0.00237493 | 0.261313 | 8.20E-12  |
| rs12208357  | T | C | 0.0569843  | 0.00409617 | 0.070102 | 5.40E-44  |
| rs146534110 | T | G | 0.0680211  | 0.00910045 | 0.013304 | 7.80E-14  |
| rs118039278 | A | G | 0.0835056  | 0.00388533 | 0.078672 | 1.80E-102 |
| rs7746081   | A | G | -0.0234725 | 0.00226701 | 0.304113 | 4.00E-25  |
| rs9496567   | A | G | -0.0174316 | 0.00243272 | 0.243458 | 7.80E-13  |
| rs79220007  | C | T | -0.057338  | 0.00392142 | 0.076135 | 2.00E-48  |
| rs3823376   | T | C | 0.0172774  | 0.0020812  | 0.502179 | 1.00E-16  |
| rs34568880  | T | C | 0.0560827  | 0.00908804 | 0.013313 | 6.80E-10  |
| rs3822855   | T | G | 0.0178418  | 0.00212447 | 0.40166  | 4.50E-17  |
| rs117733303 | G | A | 0.0838178  | 0.00773844 | 0.018422 | 2.40E-27  |
| rs2820226   | A | G | -0.012864  | 0.00209731 | 0.451903 | 8.60E-10  |
| rs9471968   | G | A | -0.0116148 | 0.00209345 | 0.545696 | 2.90E-08  |
| rs869412    | C | T | -0.0142314 | 0.00250093 | 0.225684 | 1.30E-08  |
| rs28406917  | T | C | 0.0119057  | 0.00211433 | 0.427624 | 1.80E-08  |
| rs56130071  | C | G | 0.0331798  | 0.00253796 | 0.216984 | 4.70E-39  |
| rs61003864  | C | T | 0.0155966  | 0.00267616 | 0.187128 | 5.60E-09  |
| rs60612724  | G | A | 0.0323852  | 0.00541912 | 0.038647 | 2.30E-09  |
| rs111338114 | G | A | -0.0287743 | 0.00492283 | 0.05601  | 5.10E-09  |
| rs10231941  | C | T | 0.0198565  | 0.00272709 | 0.177717 | 3.30E-13  |
| rs4148826   | C | T | -0.0157917 | 0.0027233  | 0.18045  | 6.70E-09  |
| rs2073547   | G | A | 0.0355498  | 0.00267287 | 0.184007 | 2.30E-40  |
| rs117139027 | A | G | -0.0571106 | 0.00792993 | 0.017594 | 5.90E-13  |
| rs28615248  | C | T | 0.0184347  | 0.00263568 | 0.196095 | 2.70E-12  |
| rs4738684   | G | A | -0.0315439 | 0.00220937 | 0.664652 | 3.00E-46  |
| rs55831924  | T | C | 0.0156761  | 0.0021829  | 0.361448 | 6.90E-13  |
| rs1350559   | G | C | 0.0137824  | 0.00213685 | 0.401347 | 1.10E-10  |
| rs2737265   | G | A | -0.0202743 | 0.002322   | 0.28046  | 2.50E-18  |
| rs28601761  | G | C | -0.0620105 | 0.00213624 | 0.418688 | 2.90E-185 |
| rs9987289   | G | A | 0.0453824  | 0.00362169 | 0.908808 | 5.10E-36  |
| rs34265667  | A | G | -0.0320529 | 0.00575731 | 0.033987 | 2.60E-08  |
| rs28814720  | G | A | 0.0121747  | 0.00215073 | 0.519766 | 1.50E-08  |
| rs10448340  | G | T | -0.0150594 | 0.00223737 | 0.319765 | 1.70E-11  |

|             |   |   |            |            |          |          |
|-------------|---|---|------------|------------|----------|----------|
| rs2519093   | T | C | 0.0557289  | 0.0026865  | 0.18451  | 1.40E-95 |
| rs3780181   | G | A | -0.0278983 | 0.00418323 | 0.067627 | 2.60E-11 |
| rs6475606   | T | C | -0.0202689 | 0.00208367 | 0.48447  | 2.30E-22 |
| rs6560499   | A | G | -0.0122028 | 0.00212189 | 0.576007 | 8.90E-09 |
| rs2066714   | C | T | 0.0210151  | 0.00310964 | 0.128775 | 1.40E-11 |
| rs2740488   | C | A | -0.0252452 | 0.00236503 | 0.265466 | 1.30E-26 |
| rs79828839  | T | C | 0.0144987  | 0.00261498 | 0.198784 | 2.90E-08 |
| rs2068888   | A | G | -0.0192081 | 0.00209421 | 0.450695 | 4.60E-20 |
| rs76468627  | T | C | -0.0217346 | 0.00394926 | 0.07587  | 3.70E-08 |
| rs2250802   | A | G | -0.0181939 | 0.00233224 | 0.72434  | 6.10E-15 |
| rs11014204  | T | C | 0.0137924  | 0.00233007 | 0.280227 | 3.20E-09 |
| rs17476364  | C | T | -0.0216418 | 0.00335937 | 0.108328 | 1.20E-10 |
| rs12246352  | G | A | 0.0257335  | 0.00342791 | 0.103895 | 6.00E-14 |
| rs11601507  | A | C | 0.0322012  | 0.00404981 | 0.069468 | 1.80E-15 |
| rs11226108  | C | G | -0.016026  | 0.00265376 | 0.191562 | 1.60E-09 |
| rs10832963  | G | T | 0.0173059  | 0.00239616 | 0.744224 | 5.10E-13 |
| rs174564    | G | A | -0.0318977 | 0.0021896  | 0.348557 | 4.50E-48 |
| rs964184    | C | G | -0.0575823 | 0.00306356 | 0.866409 | 8.20E-79 |
| rs7108486   | C | T | -0.0386029 | 0.00692024 | 0.023721 | 2.40E-08 |
| rs4930163   | A | G | 0.0174597  | 0.00285203 | 0.159456 | 9.20E-10 |
| rs4307732   | A | G | 0.0448315  | 0.0033985  | 0.105876 | 9.80E-40 |
| rs2160994   | C | T | 0.0182581  | 0.00218417 | 0.647494 | 6.30E-17 |
| rs61754230  | T | C | 0.0430117  | 0.00748441 | 0.019784 | 9.10E-09 |
| rs597808    | G | A | 0.0271066  | 0.00209151 | 0.515915 | 2.10E-38 |
| rs35882350  | G | A | 0.0139684  | 0.00237417 | 0.261067 | 4.00E-09 |
| rs11065385  | G | A | -0.0244904 | 0.00225744 | 0.690891 | 2.00E-27 |
| rs2391825   | A | G | -0.0129848 | 0.00233356 | 0.279219 | 2.60E-08 |
| rs2238162   | T | C | -0.0165008 | 0.00208847 | 0.522955 | 2.80E-15 |
| rs6602912   | G | T | 0.0221997  | 0.00231001 | 0.284854 | 7.20E-22 |
| rs11621792  | T | C | 0.0191489  | 0.00211033 | 0.452867 | 1.10E-19 |
| rs61988556  | C | T | -0.0224158 | 0.00372109 | 0.086142 | 1.70E-09 |
| rs145730801 | C | T | 0.0359995  | 0.00516918 | 0.044378 | 3.30E-12 |
| rs2043085   | C | T | -0.017018  | 0.00214177 | 0.612225 | 1.90E-15 |
| rs6495122   | C | A | 0.0143852  | 0.00211976 | 0.591279 | 1.20E-11 |
| rs12445804  | A | G | 0.0229888  | 0.0040052  | 0.074901 | 9.50E-09 |
| rs7202323   | G | T | -0.0255365 | 0.00247732 | 0.229741 | 6.50E-25 |
| rs4782568   | G | C | -0.0165059 | 0.00210805 | 0.450902 | 4.90E-15 |
| rs183130    | T | C | -0.0329541 | 0.00223034 | 0.323808 | 2.10E-49 |
| rs62033400  | G | A | -0.0144167 | 0.00213447 | 0.394662 | 1.40E-11 |
| rs9929977   | A | T | 0.0167269  | 0.00216129 | 0.369846 | 1.00E-14 |
| rs34042070  | G | C | 0.0485227  | 0.00268011 | 0.187927 | 2.90E-73 |
| rs72631343  | G | C | -0.0292893 | 0.00311032 | 0.128894 | 4.60E-21 |

|             |   |   |            |            |          |           |
|-------------|---|---|------------|------------|----------|-----------|
| rs1801689   | C | A | 0.061862   | 0.00605788 | 0.030551 | 1.80E-24  |
| rs72911393  | T | C | -0.0182619 | 0.00294119 | 0.147618 | 5.30E-10  |
| rs55714927  | T | C | -0.0264314 | 0.00265551 | 0.190364 | 2.40E-23  |
| rs9894946   | G | A | -0.0173333 | 0.00290132 | 0.841112 | 2.30E-09  |
| rs77542162  | G | A | 0.128484   | 0.0070401  | 0.022495 | 2.10E-74  |
| rs77960347  | G | A | 0.0706209  | 0.00908667 | 0.013351 | 7.70E-15  |
| rs7241918   | T | G | 0.0157471  | 0.00274939 | 0.82411  | 1.00E-08  |
| rs440677    | A | G | -0.0159238 | 0.00215434 | 0.623063 | 1.50E-13  |
| rs35511051  | A | C | -0.0217862 | 0.00254546 | 0.209985 | 1.10E-17  |
| rs2738447   | C | A | 0.0422734  | 0.00211024 | 0.592612 | 2.90E-89  |
| rs1551891   | A | G | -0.173628  | 0.00366029 | 0.088107 | 1.00E-200 |
| rs4263041   | G | A | -0.0699797 | 0.00251019 | 0.283209 | 4.90E-171 |
| rs111273322 | A | G | 0.0217698  | 0.00334926 | 0.108352 | 8.00E-11  |
| rs5112      | G | C | 0.0277824  | 0.00222587 | 0.533387 | 9.40E-36  |
| rs516316    | C | G | 0.0296183  | 0.00206761 | 0.507935 | 1.50E-46  |
| rs143020224 | G | C | -0.168952  | 0.00320833 | 0.118603 | 1.00E-200 |
| rs8107974   | T | A | -0.105058  | 0.00391919 | 0.075765 | 2.70E-158 |
| rs375972689 | G | T | 0.168281   | 0.0101662  | 0.01069  | 1.50E-61  |
| rs1010759   | A | G | -0.0231042 | 0.00300476 | 0.140367 | 1.50E-14  |
| rs1883711   | C | G | 0.10277    | 0.0060919  | 0.031412 | 7.50E-64  |
| rs6031587   | T | C | -0.0256479 | 0.00413761 | 0.071963 | 5.70E-10  |
| rs6074012   | C | T | 0.0116537  | 0.00208962 | 0.523914 | 2.40E-08  |
| rs17569873  | T | C | 0.0171196  | 0.00260335 | 0.201299 | 4.80E-11  |
| rs438568    | G | A | 0.0124777  | 0.00213986 | 0.609246 | 5.50E-09  |
| rs2618566   | T | G | -0.0249198 | 0.00219993 | 0.659861 | 9.60E-30  |
| rs2256814   | A | G | 0.0152618  | 0.00262512 | 0.197877 | 6.10E-09  |
| rs960596    | T | C | 0.0135068  | 0.00221758 | 0.33932  | 1.10E-09  |
| rs12162782  | G | T | 0.0129592  | 0.00219352 | 0.344365 | 3.50E-09  |

A1: Effect Allele; A2: Alternative Allele; EAF: Effect Allele Frequency; Beta: beta coefficient; SE: Standard error of beta coefficient; *p*: *p*-value of the meta-analysis

**Table S3.** SNPs of triglycerides extracted from UK Biobank with statistically significant threshold

| rsID        | A1 | A2 | BETA       | SE         | EAF      | <i>p</i> value |
|-------------|----|----|------------|------------|----------|----------------|
| rs11206374  | A  | G  | 0.0250232  | 0.00237577 | 0.224815 | 6.10E-26       |
| rs74090351  | A  | G  | -0.0250097 | 0.00393658 | 0.068143 | 2.10E-10       |
| rs9436661   | G  | T  | -0.0777322 | 0.00207793 | 0.352919 | 1.00E-200      |
| rs1044808   | C  | G  | -0.0247492 | 0.00362188 | 0.081237 | 8.30E-12       |
| rs1760801   | A  | G  | -0.0202981 | 0.00218442 | 0.295768 | 1.50E-20       |
| rs9425589   | A  | G  | -0.0137618 | 0.00200182 | 0.566781 | 6.20E-12       |
| rs114165349 | C  | G  | 0.0818126  | 0.00663594 | 0.023157 | 6.30E-35       |
| rs213494    | T  | C  | 0.0156106  | 0.00207578 | 0.648345 | 5.50E-14       |

|             |   |   |            |            |          |           |
|-------------|---|---|------------|------------|----------|-----------|
| rs698927    | C | A | -0.0183059 | 0.00256302 | 0.183785 | 9.20E-13  |
| rs320369    | G | A | -0.0125327 | 0.00214567 | 0.683292 | 5.20E-09  |
| rs880315    | C | T | -0.011772  | 0.00210497 | 0.340211 | 2.20E-08  |
| rs36043408  | A | G | -0.0128072 | 0.00198554 | 0.502153 | 1.10E-10  |
| rs61830291  | C | A | 0.0287484  | 0.00337913 | 0.095791 | 1.80E-17  |
| rs11122450  | G | T | -0.0481745 | 0.0020373  | 0.611733 | 1.30E-123 |
| rs2131311   | G | A | -0.0124181 | 0.00222753 | 0.714636 | 2.50E-08  |
| rs1938566   | T | C | -0.0212127 | 0.00267054 | 0.834537 | 2.00E-15  |
| rs11240358  | A | G | 0.0135651  | 0.00202953 | 0.394026 | 2.30E-11  |
| rs11118310  | T | A | 0.0193178  | 0.00202011 | 0.593476 | 1.10E-21  |
| rs1043897   | T | G | -0.014664  | 0.00201517 | 0.415585 | 3.40E-13  |
| rs1473886   | T | G | -0.0181218 | 0.00198519 | 0.477624 | 6.90E-20  |
| rs954244    | G | C | 0.015323   | 0.00227424 | 0.254641 | 1.60E-11  |
| rs2382825   | T | C | -0.0134774 | 0.00204919 | 0.622954 | 4.80E-11  |
| rs676210    | A | G | -0.0735169 | 0.00244968 | 0.205293 | 7.10E-198 |
| rs4665972   | C | T | -0.10025   | 0.00203577 | 0.604587 | 1.00E-200 |
| rs150419156 | A | G | -0.0505491 | 0.00847063 | 0.015259 | 2.40E-09  |
| rs10210970  | T | C | 0.0232557  | 0.00292788 | 0.131448 | 2.00E-15  |
| rs13389219  | T | C | -0.0376242 | 0.00202704 | 0.392551 | 6.60E-77  |
| rs3731696   | G | A | 0.0218939  | 0.00303176 | 0.121188 | 5.10E-13  |
| rs78058190  | A | G | 0.0816071  | 0.00510649 | 0.05045  | 1.70E-57  |
| rs2943645   | T | C | 0.0402918  | 0.00207151 | 0.646594 | 2.90E-84  |
| rs12475332  | G | T | -0.0140007 | 0.00225386 | 0.260988 | 5.20E-10  |
| rs3820897   | C | T | 0.0197269  | 0.00260304 | 0.819861 | 3.50E-14  |
| rs72784786  | A | G | 0.0263468  | 0.00416714 | 0.060638 | 2.60E-10  |
| rs6752845   | C | G | -0.0137812 | 0.00200389 | 0.431425 | 6.10E-12  |
| rs7424120   | T | C | -0.0123561 | 0.00203065 | 0.601724 | 1.20E-09  |
| rs1009360   | C | T | -0.0184832 | 0.00200785 | 0.41859  | 3.40E-20  |
| rs1420384   | T | G | -0.01279   | 0.00210534 | 0.66699  | 1.20E-09  |
| rs11904650  | G | A | 0.0410641  | 0.00692419 | 0.020999 | 3.00E-09  |
| rs4128205   | C | A | 0.0115011  | 0.00199472 | 0.509173 | 8.10E-09  |
| rs17326656  | T | G | 0.0174394  | 0.00233365 | 0.238472 | 7.80E-14  |
| rs62135012  | A | G | -0.0117482 | 0.00207507 | 0.357929 | 1.50E-08  |
| rs6432622   | G | A | -0.0108868 | 0.00198007 | 0.490264 | 3.80E-08  |
| rs4675812   | A | G | -0.0142305 | 0.00201176 | 0.587882 | 1.50E-12  |
| rs6800707   | G | C | 0.0298848  | 0.00253832 | 0.810543 | 5.30E-32  |
| rs62271373  | A | T | 0.0419639  | 0.00426588 | 0.059967 | 7.80E-23  |
| rs62274099  | T | C | 0.0120882  | 0.00202424 | 0.424205 | 2.30E-09  |
| rs2137557   | C | T | 0.0117624  | 0.00208003 | 0.645612 | 1.60E-08  |
| rs6805924   | T | G | 0.0109684  | 0.00200571 | 0.430548 | 4.50E-08  |
| rs684773    | C | A | 0.0291133  | 0.00234718 | 0.766797 | 2.50E-35  |
| rs3103310   | G | A | 0.0202549  | 0.00236652 | 0.241785 | 1.10E-17  |

|             |   |   |            |            |          |          |
|-------------|---|---|------------|------------|----------|----------|
| rs9831084   | C | T | -0.0118516 | 0.00199656 | 0.461922 | 2.90E-09 |
| rs73238173  | G | C | -0.0165938 | 0.00295427 | 0.129955 | 1.90E-08 |
| rs10513688  | A | G | 0.0247828  | 0.00334924 | 0.097403 | 1.40E-13 |
| rs79287178  | A | G | 0.0500946  | 0.00600435 | 0.031151 | 7.20E-17 |
| rs11185542  | C | G | -0.0126395 | 0.00223848 | 0.727914 | 1.60E-08 |
| rs6792725   | G | A | -0.0152543 | 0.00221886 | 0.692404 | 6.20E-12 |
| rs13066793  | G | A | -0.0224583 | 0.00347278 | 0.090095 | 1.00E-10 |
| rs12504746  | T | C | -0.0152674 | 0.00252148 | 0.192857 | 1.40E-09 |
| rs2237029   | A | G | -0.0139399 | 0.00204019 | 0.601353 | 8.30E-12 |
| rs13101504  | G | T | 0.0195598  | 0.00240753 | 0.412851 | 4.50E-16 |
| rs1347188   | G | A | 0.0139021  | 0.00231385 | 0.245797 | 1.90E-09 |
| rs71603401  | G | A | 0.0264991  | 0.00291753 | 0.136804 | 1.10E-19 |
| rs11722924  | C | G | 0.0129095  | 0.00199093 | 0.53531  | 8.90E-11 |
| rs13118477  | A | G | 0.0149897  | 0.00203847 | 0.392654 | 1.90E-13 |
| rs148827772 | G | A | 0.0465516  | 0.00710636 | 0.022544 | 5.70E-11 |
| rs11100083  | C | T | -0.0160248 | 0.00237585 | 0.226214 | 1.50E-11 |
| rs278981    | C | T | 0.0125871  | 0.00229058 | 0.758155 | 3.90E-08 |
| rs3775228   | T | C | 0.0338197  | 0.00203602 | 0.399717 | 5.80E-62 |
| rs6532798   | T | C | 0.013792   | 0.00216353 | 0.697405 | 1.80E-10 |
| rs13108218  | G | A | -0.0305169 | 0.00205811 | 0.614859 | 9.70E-50 |
| rs13107325  | T | C | 0.0300749  | 0.00377743 | 0.074905 | 1.70E-15 |
| rs7735249   | G | C | 0.0268635  | 0.00315997 | 0.112767 | 1.90E-17 |
| rs55646464  | T | G | 0.0121913  | 0.00217016 | 0.300087 | 1.90E-08 |
| rs72644085  | C | T | -0.0196036 | 0.00281241 | 0.146036 | 3.20E-12 |
| rs193735    | A | G | 0.0329807  | 0.00529922 | 0.036665 | 4.90E-10 |
| rs970069    | T | C | 0.0162322  | 0.00243455 | 0.212039 | 2.60E-11 |
| rs6882076   | C | T | 0.0331011  | 0.00206122 | 0.634285 | 4.90E-58 |
| rs62397245  | G | C | 0.0149941  | 0.00239634 | 0.22236  | 3.90E-10 |
| rs11746801  | A | G | -0.0123657 | 0.00207937 | 0.637069 | 2.70E-09 |
| rs4976033   | G | A | 0.0177909  | 0.00205178 | 0.402122 | 4.30E-18 |
| rs7704653   | G | A | 0.0157533  | 0.00224582 | 0.723029 | 2.30E-12 |
| rs72801474  | A | G | -0.0307938 | 0.00344154 | 0.091843 | 3.60E-19 |
| rs13354321  | C | T | -0.0154305 | 0.00201429 | 0.409787 | 1.90E-14 |
| rs1316753   | C | G | -0.0145732 | 0.00202974 | 0.394062 | 7.00E-13 |
| rs7714361   | C | A | 0.0138858  | 0.00236622 | 0.233667 | 4.40E-09 |
| rs1045241   | T | C | -0.0206988 | 0.00224699 | 0.270943 | 3.20E-20 |
| rs325485    | G | A | -0.0117435 | 0.00204042 | 0.602889 | 8.60E-09 |
| rs7244      | A | G | 0.0151978  | 0.00261808 | 0.174166 | 6.40E-09 |
| rs78588343  | A | G | -0.0155231 | 0.0026035  | 0.176216 | 2.50E-09 |
| rs28752924  | G | T | 0.0243875  | 0.00276364 | 0.243148 | 1.10E-18 |
| rs186413375 | C | A | 0.037979   | 0.00423249 | 0.083486 | 2.90E-19 |
| rs138191773 | A | G | -0.0471717 | 0.00791884 | 0.017021 | 2.60E-09 |

|             |   |   |            |            |          |           |
|-------------|---|---|------------|------------|----------|-----------|
| rs17585887  | C | T | -0.0285849 | 0.00201656 | 0.591074 | 1.30E-45  |
| rs9376511   | G | A | -0.0154993 | 0.00246511 | 0.203288 | 3.20E-10  |
| rs4134963   | T | C | -0.0189544 | 0.00254235 | 0.189878 | 9.00E-14  |
| rs28383314  | C | T | 0.0379005  | 0.00204671 | 0.624109 | 1.50E-76  |
| rs77009508  | G | A | 0.0450912  | 0.00379997 | 0.073734 | 1.80E-32  |
| rs9368503   | T | A | -0.0119616 | 0.00198801 | 0.510113 | 1.80E-09  |
| rs998584    | A | C | 0.0401182  | 0.00198999 | 0.482727 | 2.20E-90  |
| rs62427982  | T | C | -0.0133153 | 0.00213196 | 0.32217  | 4.20E-10  |
| rs186696265 | T | C | -0.104318  | 0.00828522 | 0.014693 | 2.40E-36  |
| rs729761    | G | T | 0.0177868  | 0.00221435 | 0.711859 | 9.50E-16  |
| rs1835346   | G | A | -0.0391877 | 0.00654659 | 0.023874 | 2.20E-09  |
| rs1064173   | A | G | -0.0213585 | 0.00230298 | 0.284399 | 1.80E-20  |
| rs2983896   | A | G | 0.0137912  | 0.00242177 | 0.21474  | 1.20E-08  |
| rs9480889   | G | C | 0.0163067  | 0.0024101  | 0.783137 | 1.30E-11  |
| rs6916318   | T | A | 0.0267283  | 0.0019907  | 0.530533 | 4.20E-41  |
| rs73025562  | A | G | 0.0138633  | 0.00231292 | 0.245879 | 2.00E-09  |
| rs852388    | C | G | 0.0157124  | 0.00245601 | 0.211278 | 1.60E-10  |
| rs62459095  | T | C | -0.0319865 | 0.00426882 | 0.061781 | 6.70E-14  |
| rs2240466   | A | G | -0.122769  | 0.00301848 | 0.122916 | 1.00E-200 |
| rs41785     | A | C | -0.0150445 | 0.00201492 | 0.417487 | 8.20E-14  |
| rs62473520  | C | T | -0.0211003 | 0.00380118 | 0.077998 | 2.80E-08  |
| rs71538127  | G | C | 0.0176494  | 0.00303718 | 0.122052 | 6.20E-09  |
| rs10242866  | T | C | 0.015793   | 0.00202877 | 0.398698 | 7.00E-15  |
| rs1799831   | T | C | 0.024506   | 0.00273953 | 0.156029 | 3.70E-19  |
| rs7786339   | T | C | 0.016328   | 0.00265352 | 0.168936 | 7.60E-10  |
| rs72555385  | G | A | 0.0653776  | 0.0046178  | 0.048975 | 1.70E-45  |
| rs10277582  | T | C | -0.0173714 | 0.00308015 | 0.118591 | 1.70E-08  |
| rs2699805   | A | G | -0.0201313 | 0.00203748 | 0.399672 | 5.10E-23  |
| rs12669911  | C | A | -0.0118536 | 0.00205405 | 0.614026 | 7.90E-09  |
| rs72603744  | C | A | -0.0125232 | 0.00213684 | 0.315623 | 4.60E-09  |
| rs12530679  | G | A | -0.0121299 | 0.00201682 | 0.48466  | 1.80E-09  |
| rs75721796  | A | G | 0.0210491  | 0.00245993 | 0.214459 | 1.20E-17  |
| rs4731701   | T | C | -0.0325803 | 0.00198921 | 0.493088 | 2.70E-60  |
| rs4841580   | C | T | -0.0245383 | 0.00200093 | 0.434941 | 1.40E-34  |
| rs79153732  | T | C | 0.0773626  | 0.00758596 | 0.017389 | 2.00E-24  |
| rs7000494   | C | G | 0.136538   | 0.00584159 | 0.030042 | 8.00E-121 |
| rs150564454 | A | G | -0.101751  | 0.00963178 | 0.011556 | 4.40E-26  |
| rs1544980   | C | T | 0.0238704  | 0.00248513 | 0.198644 | 7.60E-22  |
| rs343       | A | C | -0.141493  | 0.00361052 | 0.083129 | 1.00E-200 |
| rs2081687   | C | T | -0.0261379 | 0.00209126 | 0.663201 | 7.60E-36  |
| rs6999569   | G | A | -0.0860885 | 0.00198061 | 0.470737 | 1.00E-200 |
| rs13264304  | G | C | 0.0189102  | 0.00276507 | 0.151023 | 8.00E-12  |

|             |   |   |            |            |          |           |
|-------------|---|---|------------|------------|----------|-----------|
| rs308       | G | T | -0.159413  | 0.00698442 | 0.020597 | 2.60E-115 |
| rs13269725  | G | A | 0.0349878  | 0.0036804  | 0.078416 | 2.00E-21  |
| rs3808477   | T | C | -0.0133854 | 0.00220342 | 0.279294 | 1.20E-09  |
| rs75609851  | A | G | -0.199116  | 0.0100401  | 0.01048  | 1.60E-87  |
| rs2407278   | G | A | -0.0339449 | 0.00581961 | 0.030154 | 5.40E-09  |
| rs28439112  | A | T | 0.0126014  | 0.00226754 | 0.255528 | 2.70E-08  |
| rs2244278   | A | C | -0.0269912 | 0.00306133 | 0.120553 | 1.20E-18  |
| rs1567353   | G | C | 0.0148202  | 0.00216358 | 0.307644 | 7.40E-12  |
| rs581080    | C | G | 0.0175432  | 0.00258442 | 0.819008 | 1.10E-11  |
| rs696825    | T | C | -0.0202838 | 0.00228763 | 0.252926 | 7.50E-19  |
| rs10797119  | C | T | 0.0157113  | 0.00200465 | 0.536622 | 4.60E-15  |
| rs2131919   | G | A | 0.0173511  | 0.00268396 | 0.164266 | 1.00E-10  |
| rs2519093   | T | C | -0.021158  | 0.00256189 | 0.184548 | 1.50E-16  |
| rs7847285   | C | T | -0.0116104 | 0.00202626 | 0.589213 | 1.00E-08  |
| rs10811662  | A | G | -0.0154098 | 0.0026291  | 0.173212 | 4.60E-09  |
| rs7861679   | T | C | 0.0122025  | 0.00216741 | 0.696815 | 1.80E-08  |
| rs11187019  | G | A | -0.0116437 | 0.00200546 | 0.550621 | 6.40E-09  |
| rs10822163  | G | C | -0.0321674 | 0.00199059 | 0.473369 | 9.70E-59  |
| rs7077812   | C | T | 0.0142284  | 0.00250611 | 0.194911 | 1.40E-08  |
| rs2068888   | A | G | -0.0318216 | 0.00199589 | 0.450732 | 3.20E-57  |
| rs56397607  | G | A | 0.0174851  | 0.00257608 | 0.182538 | 1.10E-11  |
| rs80276949  | A | G | 0.0457563  | 0.00669008 | 0.022677 | 8.00E-12  |
| rs113344423 | A | G | 0.0434468  | 0.00428926 | 0.060177 | 4.10E-24  |
| rs55767272  | C | A | -0.0282011 | 0.00403602 | 0.065077 | 2.80E-12  |
| rs11000468  | T | C | -0.0148544 | 0.00231748 | 0.255269 | 1.50E-10  |
| rs2487294   | T | G | 0.0183191  | 0.00222084 | 0.723477 | 1.60E-16  |
| rs140107293 | G | A | -0.0227003 | 0.00275296 | 0.154707 | 1.60E-16  |
| rs3758413   | C | T | 0.0111232  | 0.00201767 | 0.417724 | 3.50E-08  |
| rs10883026  | T | C | -0.0144604 | 0.00200472 | 0.521569 | 5.50E-13  |
| rs2773469   | G | A | -0.0188717 | 0.00225426 | 0.733286 | 5.70E-17  |
| rs1133400   | G | A | 0.0137462  | 0.00239759 | 0.219923 | 9.80E-09  |
| rs499293    | A | G | -0.0117912 | 0.00208902 | 0.65807  | 1.70E-08  |
| rs174566    | G | A | 0.0485019  | 0.00207982 | 0.34974  | 2.80E-120 |
| rs480823    | C | T | 0.15572    | 0.00371974 | 0.078996 | 1.00E-200 |
| rs150423652 | T | G | 0.285824   | 0.0122924  | 0.006675 | 1.40E-119 |
| rs551243    | C | G | 0.0143952  | 0.00199178 | 0.469258 | 4.90E-13  |
| rs10899490  | T | C | -0.0170082 | 0.00269347 | 0.161369 | 2.70E-10  |
| rs61905078  | C | A | 0.199898   | 0.00379494 | 0.073841 | 1.00E-200 |
| rs150555490 | T | C | -0.0384234 | 0.00427544 | 0.056868 | 2.50E-19  |
| rs61729990  | A | C | -0.0558488 | 0.00752135 | 0.017888 | 1.10E-13  |
| rs117291242 | T | C | 0.0297851  | 0.00528225 | 0.036536 | 1.70E-08  |
| rs117287238 | A | G | -0.0394324 | 0.00614684 | 0.028185 | 1.40E-10  |

|             |   |   |            |            |          |           |
|-------------|---|---|------------|------------|----------|-----------|
| rs75268115  | G | A | -0.0207435 | 0.0035798  | 0.084699 | 6.80E-09  |
| rs326222    | C | T | 0.0252203  | 0.00215698 | 0.697957 | 1.40E-31  |
| rs11600815  | A | G | -0.0322469 | 0.00458644 | 0.051753 | 2.10E-12  |
| rs2302263   | T | C | 0.0436112  | 0.00349051 | 0.088863 | 8.00E-36  |
| rs7947951   | G | A | 0.0193777  | 0.00214074 | 0.689254 | 1.40E-19  |
| rs11030107  | G | A | 0.0160418  | 0.00225693 | 0.260757 | 1.20E-12  |
| rs3974807   | T | C | 0.0159776  | 0.00253125 | 0.189267 | 2.80E-10  |
| rs10750766  | A | C | 0.0193855  | 0.00218742 | 0.709959 | 7.80E-19  |
| rs78484485  | A | G | -0.0758529 | 0.00439863 | 0.054016 | 1.20E-66  |
| rs79357714  | G | A | -0.0289463 | 0.00476453 | 0.045724 | 1.20E-09  |
| rs75942983  | T | A | -0.0201303 | 0.00361206 | 0.083627 | 2.50E-08  |
| rs10773049  | C | T | -0.0290398 | 0.00203691 | 0.39535  | 4.10E-46  |
| rs67981690  | G | A | 0.0299225  | 0.00297454 | 0.129887 | 8.30E-24  |
| rs4760254   | C | G | -0.0281414 | 0.00232488 | 0.23908  | 1.00E-33  |
| rs139386986 | T | C | -0.0216903 | 0.0035608  | 0.092129 | 1.10E-09  |
| rs4761234   | C | T | -0.0140236 | 0.00199376 | 0.484365 | 2.00E-12  |
| rs117233107 | A | G | -0.0732317 | 0.0086122  | 0.015176 | 1.80E-17  |
| rs10773000  | T | G | -0.0149294 | 0.0021148  | 0.332276 | 1.70E-12  |
| rs7308584   | A | G | 0.0149992  | 0.00256911 | 0.184436 | 5.30E-09  |
| rs7134375   | A | C | -0.0171435 | 0.00200504 | 0.431174 | 1.20E-17  |
| rs7135509   | C | T | -0.0121338 | 0.00221197 | 0.293196 | 4.10E-08  |
| rs35763453  | C | T | 0.02845    | 0.00435137 | 0.058647 | 6.20E-11  |
| rs12424054  | A | G | 0.0191212  | 0.00235346 | 0.232437 | 4.50E-16  |
| rs4765148   | T | G | -0.0251537 | 0.0021456  | 0.312686 | 9.70E-32  |
| rs149778057 | C | A | -0.0157568 | 0.0022259  | 0.32832  | 1.50E-12  |
| rs7400002   | G | A | 0.0139701  | 0.00236663 | 0.230609 | 3.60E-09  |
| rs7140110   | C | T | 0.0283172  | 0.00217811 | 0.298338 | 1.20E-38  |
| rs6562773   | G | A | -0.0120538 | 0.00201057 | 0.547533 | 2.00E-09  |
| rs9561643   | C | A | 0.0167149  | 0.00214481 | 0.314726 | 6.50E-15  |
| rs1340819   | C | A | -0.0121655 | 0.00209472 | 0.345011 | 6.30E-09  |
| rs2812208   | C | G | -0.048426  | 0.00696323 | 0.02089  | 3.50E-12  |
| rs9584870   | C | T | -0.0123562 | 0.00210377 | 0.366179 | 4.30E-09  |
| rs2070341   | T | C | 0.0113012  | 0.00203413 | 0.60309  | 2.80E-08  |
| rs2240533   | C | T | -0.0129897 | 0.00215234 | 0.309898 | 1.60E-09  |
| rs61993685  | C | T | -0.0234087 | 0.00373997 | 0.076413 | 3.90E-10  |
| rs6572807   | G | A | 0.0124759  | 0.00224899 | 0.267065 | 2.90E-08  |
| rs12880341  | C | T | 0.0209696  | 0.00273647 | 0.159023 | 1.80E-14  |
| rs56902258  | A | T | -0.0151434 | 0.0025129  | 0.196198 | 1.70E-09  |
| rs139974673 | C | T | 0.143073   | 0.00623867 | 0.026131 | 2.20E-116 |
| rs11637681  | G | A | 0.0125866  | 0.00224251 | 0.276291 | 2.00E-08  |
| rs150460588 | C | T | 0.0326952  | 0.00484966 | 0.044425 | 1.60E-11  |
| rs2043085   | C | T | -0.0308028 | 0.00204157 | 0.612184 | 1.90E-51  |



|             |   |   |            |            |          |           |
|-------------|---|---|------------|------------|----------|-----------|
| rs1077835   | G | A | 0.0473668  | 0.00240452 | 0.220459 | 2.20E-86  |
| rs12440800  | T | A | 0.0161     | 0.00229294 | 0.255149 | 2.20E-12  |
| rs12902047  | C | A | -0.0129253 | 0.00214533 | 0.313907 | 1.70E-09  |
| rs10152471  | A | G | -0.0135209 | 0.00204778 | 0.388656 | 4.00E-11  |
| rs275184    | G | T | -0.0173487 | 0.00275263 | 0.162051 | 2.90E-10  |
| rs17184382  | C | A | -0.0219251 | 0.00201039 | 0.425367 | 1.10E-27  |
| rs1037117   | A | G | 0.0172213  | 0.00229153 | 0.254798 | 5.70E-14  |
| rs143076454 | A | G | 0.0403999  | 0.00735364 | 0.018647 | 3.90E-08  |
| rs12926107  | G | A | 0.0126364  | 0.0020014  | 0.454903 | 2.70E-10  |
| rs2937124   | T | C | -0.0182561 | 0.00212336 | 0.362769 | 8.10E-18  |
| rs12928099  | A | C | -0.0282116 | 0.00218133 | 0.296442 | 2.90E-38  |
| rs3814883   | T | C | 0.0148926  | 0.00199657 | 0.482498 | 8.70E-14  |
| rs12446515  | T | C | -0.0334207 | 0.00213589 | 0.322889 | 3.50E-55  |
| rs34682685  | A | G | 0.0337428  | 0.00326987 | 0.104198 | 5.80E-25  |
| rs4471666   | G | T | -0.022461  | 0.00396699 | 0.069488 | 1.50E-08  |
| rs28577186  | A | G | -0.0163428 | 0.00211672 | 0.664571 | 1.20E-14  |
| rs2925979   | C | T | -0.0322092 | 0.00217095 | 0.699976 | 8.50E-50  |
| rs742036    | A | G | -0.0143632 | 0.00205112 | 0.375259 | 2.50E-12  |
| rs112381903 | T | A | 0.0231649  | 0.00400864 | 0.06731  | 7.50E-09  |
| rs117431393 | G | A | 0.0312254  | 0.00537977 | 0.035446 | 6.50E-09  |
| rs12185242  | C | A | 0.0175265  | 0.00199898 | 0.454836 | 1.80E-18  |
| rs1801689   | C | A | -0.06613   | 0.00577722 | 0.030543 | 2.40E-30  |
| rs60856912  | T | G | 0.0248329  | 0.00270829 | 0.162906 | 4.80E-20  |
| rs9889402   | A | G | 0.0122827  | 0.00222926 | 0.728192 | 3.60E-08  |
| rs4969179   | G | T | -0.0177529 | 0.00203649 | 0.60445  | 2.80E-18  |
| rs12948505  | T | C | 0.0138887  | 0.00251214 | 0.194119 | 3.20E-08  |
| rs2304969   | T | G | -0.0161469 | 0.0028501  | 0.144932 | 1.50E-08  |
| rs1292065   | G | C | -0.0139237 | 0.00218669 | 0.709244 | 1.90E-10  |
| rs11078597  | C | T | 0.0191708  | 0.0025513  | 0.186613 | 5.70E-14  |
| rs9902027   | T | C | -0.0151609 | 0.00238645 | 0.77437  | 2.10E-10  |
| rs7215055   | G | A | 0.0389233  | 0.00410062 | 0.062892 | 2.30E-21  |
| rs10775406  | G | A | 0.0206571  | 0.00232578 | 0.759694 | 6.60E-19  |
| rs145947882 | C | A | 0.137333   | 0.0063668  | 0.025952 | 3.40E-103 |
| rs11664106  | T | A | -0.0125831 | 0.00210816 | 0.374102 | 2.40E-09  |
| rs867939    | A | G | -0.0136048 | 0.00202516 | 0.57621  | 1.80E-11  |
| rs7239575   | C | T | -0.0160767 | 0.00199133 | 0.490494 | 6.80E-16  |
| rs2187114   | A | G | -0.0185151 | 0.00330375 | 0.101024 | 2.10E-08  |
| rs6506033   | T | C | -0.0228948 | 0.00383903 | 0.072523 | 2.50E-09  |
| rs921971    | C | T | 0.01565    | 0.00225602 | 0.265901 | 4.00E-12  |
| rs62102718  | T | A | 0.0202348  | 0.00220142 | 0.286196 | 3.90E-20  |
| rs5112      | G | C | 0.0684501  | 0.00213412 | 0.533428 | 1.00E-200 |
| rs62112763  | G | C | 0.01935    | 0.00200786 | 0.438929 | 5.60E-22  |

|             |   |   |            |            |          |           |
|-------------|---|---|------------|------------|----------|-----------|
| rs483808    | T | C | -0.0136636 | 0.00218517 | 0.701973 | 4.00E-10  |
| rs2305746   | G | A | 0.0282544  | 0.0039744  | 0.933319 | 1.20E-12  |
| rs8102873   | T | C | 0.0123302  | 0.00201474 | 0.584919 | 9.40E-10  |
| rs10405944  | C | T | -0.013209  | 0.00201995 | 0.483077 | 6.20E-11  |
| rs483082    | T | G | 0.0862119  | 0.00234474 | 0.23535  | 1.00E-200 |
| rs116843064 | A | G | -0.226505  | 0.00721009 | 0.019327 | 1.00E-200 |
| rs58542926  | T | C | -0.103184  | 0.00378074 | 0.074608 | 5.30E-164 |
| rs188247550 | T | C | -0.134286  | 0.00913128 | 0.013117 | 5.90E-49  |
| rs62128802  | T | C | -0.0158746 | 0.00257782 | 0.183216 | 7.40E-10  |
| rs2081194   | C | G | -0.0214115 | 0.00207674 | 0.600934 | 6.30E-25  |
| rs2092203   | T | C | 0.0136756  | 0.00199323 | 0.481154 | 6.80E-12  |
| rs6073958   | C | T | 0.0556952  | 0.00249344 | 0.198674 | 1.60E-110 |
| rs8126001   | T | C | -0.0163778 | 0.00199681 | 0.489576 | 2.40E-16  |
| rs149142833 | T | C | 0.0169358  | 0.00276509 | 0.156359 | 9.10E-10  |
| rs6028716   | A | G | -0.0128217 | 0.00228302 | 0.258428 | 2.00E-08  |
| rs55966194  | G | C | -0.0178509 | 0.00221245 | 0.281997 | 7.10E-16  |
| rs151235402 | T | C | 0.0521833  | 0.00815144 | 0.015827 | 1.50E-10  |
| rs7274718   | A | G | 0.0159491  | 0.00202919 | 0.598516 | 3.80E-15  |
| rs394872    | T | C | 0.0111807  | 0.00200285 | 0.536237 | 2.40E-08  |
| rs6517522   | C | T | -0.0129031 | 0.00199242 | 0.498138 | 9.40E-11  |
| rs140288    | A | G | -0.0132623 | 0.00200841 | 0.566711 | 4.00E-11  |
| rs134551    | T | C | -0.0116536 | 0.00211111 | 0.335438 | 3.40E-08  |
| rs2267373   | T | C | 0.0215638  | 0.00202145 | 0.580693 | 1.40E-26  |
| rs5755799   | G | C | 0.0118859  | 0.00200343 | 0.453747 | 3.00E-09  |
| rs2071887   | A | T | 0.016312   | 0.00209671 | 0.344804 | 7.30E-15  |
| rs4253750   | C | T | 0.0177576  | 0.00243701 | 0.214455 | 3.20E-13  |

A1: Effect Allele; A2: Alternative Allele; EAF: Effect Allele Frequency; Beta: beta coefficient; SE: Standard error of beta coefficient; *p*: *p*-value of the meta-analysis

**Table S4.** SNPs of total cholesterol extracted from GLGC with statistically significant threshold

| rsID       | A1 | A2 | BETA    | SE     | EAF     | <i>p</i> value |
|------------|----|----|---------|--------|---------|----------------|
| rs11802413 | T  | C  | 0.0287  | 0.0035 | 0.5369  | 1.58E-14       |
| rs11591147 | T  | G  | -0.3341 | 0.0173 | 0.01715 | 8.83E-86       |
| rs646776   | T  | C  | 0.1272  | 0.0042 | 0.7876  | 4.78E-187      |
| rs558971   | G  | A  | 0.0398  | 0.0036 | 0.5303  | 7.02E-28       |
| rs2642438  | G  | A  | 0.037   | 0.004  | 0.7454  | 1.28E-18       |
| rs7534572  | G  | C  | 0.0629  | 0.0055 | 0.69    | 3.60E-28       |
| rs6603981  | T  | C  | 0.0351  | 0.0043 | 0.8061  | 7.85E-15       |
| rs7551981  | T  | G  | 0.0358  | 0.0037 | 0.595   | 7.50E-22       |
| rs4988235  | A  | G  | -0.0308 | 0.004  | 0.5237  | 3.97E-14       |
| rs11694172 | G  | A  | 0.0277  | 0.0041 | 0.2164  | 1.95E-09       |

|             |   |   |         |        |         |           |
|-------------|---|---|---------|--------|---------|-----------|
| rs2030746   | T | C | 0.0199  | 0.0037 | 0.3984  | 3.60E-08  |
| rs17526895  | G | A | -0.042  | 0.0067 | 0.07784 | 5.78E-09  |
| rs2287623   | A | G | -0.0273 | 0.0036 | 0.595   | 4.09E-12  |
| rs9306897   | C | T | -0.0488 | 0.0037 | 0.6966  | 7.51E-37  |
| rs780093    | C | T | -0.0515 | 0.0036 | 0.5871  | 2.59E-42  |
| rs6544713   | C | T | -0.0773 | 0.004  | 0.7058  | 1.69E-81  |
| rs6709904   | G | A | -0.0545 | 0.0083 | 0.1135  | 8.39E-10  |
| rs11563251  | T | C | 0.0368  | 0.0059 | 0.1253  | 1.27E-09  |
| rs515135    | C | T | 0.1238  | 0.0046 | 0.7823  | 6.38E-151 |
| rs13315871  | A | G | -0.0355 | 0.0061 | 0.08047 | 3.48E-08  |
| rs7616006   | G | A | -0.0315 | 0.0036 | 0.4446  | 8.41E-17  |
| rs7640978   | T | C | -0.0376 | 0.0066 | 0.1055  | 1.66E-08  |
| rs6818397   | G | T | -0.0254 | 0.0039 | 0.5871  | 9.51E-11  |
| rs4530754   | A | G | 0.0228  | 0.0035 | 0.5818  | 1.68E-09  |
| rs12916     | C | T | 0.0684  | 0.0036 | 0.4314  | 4.55E-74  |
| rs6882076   | C | T | 0.0508  | 0.0037 | 0.6662  | 5.35E-41  |
| rs2814982   | T | C | -0.0441 | 0.0057 | 0.1069  | 3.68E-15  |
| rs3757354   | T | C | -0.0348 | 0.0042 | 0.2098  | 2.22E-15  |
| rs9272775   | C | T | 0.0317  | 0.0055 | 0.2823  | 2.13E-08  |
| rs11153594  | T | C | -0.029  | 0.0036 | 0.3918  | 1.27E-14  |
| rs2315065   | A | C | 0.1102  | 0.0158 | 0.08707 | 1.10E-11  |
| rs1800562   | A | G | -0.0565 | 0.0077 | 0.04617 | 1.91E-12  |
| rs9391858   | G | A | 0.0495  | 0.005  | 0.1939  | 7.20E-22  |
| rs9376090   | C | T | -0.0254 | 0.004  | 0.2718  | 2.60E-09  |
| rs112201728 | T | C | 0.0581  | 0.0099 | 0.05805 | 1.20E-08  |
| rs11753995  | A | G | 0.0489  | 0.0048 | 0.1464  | 1.84E-23  |
| rs1997243   | G | A | 0.0332  | 0.005  | 0.1306  | 2.72E-10  |
| rs12670798  | C | T | 0.0364  | 0.0041 | 0.2243  | 9.48E-17  |
| rs2073547   | G | A | 0.0456  | 0.0047 | 0.1939  | 3.83E-21  |
| rs2737252   | A | G | -0.0331 | 0.0039 | 0.2559  | 1.63E-16  |
| rs9987289   | G | A | 0.0842  | 0.0063 | 0.9248  | 1.84E-36  |
| rs2954029   | T | A | -0.0622 | 0.0035 | 0.4683  | 2.42E-65  |
| rs7832643   | T | G | 0.0289  | 0.0037 | 0.405   | 3.12E-13  |
| rs10088180  | G | A | -0.0228 | 0.004  | 0.6781  | 6.02E-10  |
| rs4738684   | G | A | -0.0392 | 0.0037 | 0.6478  | 1.12E-23  |
| rs1883025   | T | C | -0.0671 | 0.0042 | 0.2427  | 5.75E-53  |
| rs581080    | C | G | 0.0377  | 0.0047 | 0.8206  | 1.02E-13  |
| rs11789603  | T | C | 0.0427  | 0.0062 | 0.08971 | 1.44E-11  |
| rs2066714   | C | T | 0.0442  | 0.0076 | 0.1201  | 1.14E-08  |
| rs579459    | C | T | 0.062   | 0.0044 | 0.215   | 8.83E-42  |
| rs3780181   | G | A | -0.0442 | 0.0071 | 0.05277 | 6.67E-10  |
| rs12412743  | T | C | -0.0298 | 0.0047 | 0.153   | 6.98E-10  |

|            |   |   |         |        |         |           |
|------------|---|---|---------|--------|---------|-----------|
| rs10904908 | G | A | 0.025   | 0.0036 | 0.4538  | 2.60E-11  |
| rs2255141  | G | A | -0.0314 | 0.0039 | 0.6807  | 6.51E-16  |
| rs10900221 | A | G | 0.0255  | 0.0041 | 0.2731  | 7.96E-09  |
| rs1535     | G | A | -0.0497 | 0.0037 | 0.3628  | 8.62E-39  |
| rs4752805  | G | A | 0.0251  | 0.0041 | 0.2467  | 1.62E-09  |
| rs10832962 | T | C | 0.0315  | 0.0039 | 0.719   | 1.54E-14  |
| rs964184   | C | G | -0.1214 | 0.0076 | 0.719   | 2.84E-55  |
| rs11220462 | A | G | 0.0474  | 0.0058 | 0.1425  | 5.49E-15  |
| rs3184504  | C | T | 0.0318  | 0.0037 | 0.5343  | 1.62E-17  |
| rs10773003 | A | G | 0.0369  | 0.0058 | 0.08839 | 4.08E-09  |
| rs2244608  | G | A | 0.0313  | 0.0037 | 0.3391  | 9.62E-18  |
| rs6573778  | C | T | -0.0263 | 0.0039 | 0.529   | 2.96E-11  |
| rs10468017 | T | C | 0.0617  | 0.004  | 0.2757  | 7.23E-48  |
| rs633695   | G | A | 0.0433  | 0.0058 | 0.285   | 1.05E-14  |
| rs2000999  | A | G | 0.0617  | 0.0044 | 0.1847  | 6.80E-41  |
| rs247616   | T | C | 0.0499  | 0.004  | 0.2929  | 4.47E-32  |
| rs6504872  | T | C | 0.025   | 0.0035 | 0.4723  | 6.99E-12  |
| rs2886232  | C | T | -0.0358 | 0.0062 | 0.8799  | 3.87E-08  |
| rs314253   | C | T | -0.0233 | 0.0037 | 0.3351  | 2.81E-10  |
| rs2156552  | T | A | 0.057   | 0.0047 | 0.8219  | 1.25E-31  |
| rs2228603  | T | C | -0.1217 | 0.0069 | 0.07124 | 1.05E-62  |
| rs281393   | T | C | -0.0322 | 0.0055 | 0.3734  | 4.26E-08  |
| rs8103315  | A | C | 0.0422  | 0.0055 | 0.1359  | 5.94E-15  |
| rs75687619 | T | G | 0.1592  | 0.0153 | 0.02375 | 3.61E-22  |
| rs6511720  | T | G | -0.1851 | 0.0059 | 0.09763 | 1.00E-200 |
| rs7412     | T | C | -0.3736 | 0.0096 | 0.06596 | 1.00E-200 |
| rs6016373  | G | A | -0.0319 | 0.0036 | 0.3734  | 1.00E-17  |
| rs1800961  | T | C | -0.1062 | 0.0101 | 0.0343  | 1.34E-24  |
| rs2277862  | T | C | -0.0349 | 0.0052 | 0.1319  | 5.26E-11  |
| rs2235367  | G | A | 0.0357  | 0.0035 | 0.4565  | 7.22E-25  |
| rs181360   | G | T | -0.0278 | 0.0043 | 0.1992  | 7.32E-10  |
| rs138777   | G | A | -0.0214 | 0.0037 | 0.6517  | 4.74E-08  |
| rs4253772  | T | C | 0.0322  | 0.0058 | 0.1187  | 9.85E-09  |

A1: Effect Allele; A2: Alternative Allele; EAF: Effect Allele Frequency; Beta: beta coefficient; SE: Standard error of beta coefficient; *p*: *p*-value of the meta-analysis

**Table S5.** Causal estimates of genetically predicted plasma lipid levels on the risk of AA, stratified by gender

| Exposure          | SNP (n) | Method                    | OR (95% CI)      | p value  |
|-------------------|---------|---------------------------|------------------|----------|
| HDL-C<br>(Female) | 154     | Inverse variance weighted | 1.90 (1.31-2.76) | 0.001    |
|                   |         | Weighted median           | 1.63 (0.94-2.83) | 0.081    |
|                   |         | Weighted mode             | 1.23 (0.72-2.11) | 0.450    |
|                   |         | MR Egger                  | 1.71 (0.90-3.28) | 0.105    |
| HDL-C<br>(Male)   | 110     | Inverse variance weighted | 2.27 (1.47-3.51) | 0.0002   |
|                   |         | Weighted median           | 1.98 (1.02-3.85) | 0.043    |
|                   |         | Weighted mode             | 1.75 (0.92-3.30) | 0.090    |
|                   |         | MR Egger                  | 1.49 (0.71-3.11) | 0.291    |
| LDL-C<br>(Female) | 97      | Inverse variance weighted | 0.66 (0.53-0.81) | 7.55E-05 |
|                   |         | Weighted median           | 0.69 (0.53-0.90) | 6.00E-03 |
|                   |         | Weighted mode             | 0.71 (0.56-0.91) | 7.09E-03 |
|                   |         | MR Egger                  | 0.67 (0.50-0.91) | 1.28E-02 |
| HDL-C<br>(Male)   | 71      | Inverse variance weighted | 0.67 (0.52-0.85) | 0.001    |
|                   |         | Weighted median           | 0.66 (0.49-0.88) | 0.004    |
|                   |         | Weighted mode             | 0.74 (0.56-0.97) | 0.030    |
|                   |         | MR Egger                  | 0.68 (0.48-0.96) | 0.033    |
| TG<br>(Female)    | 116     | Inverse variance weighted | 0.80 (0.67-0.96) | 0.014    |
|                   |         | Weighted median           | 0.82 (0.63-1.08) | 0.164    |
|                   |         | Weighted mode             | 0.84 (0.65-1.10) | 0.208    |
|                   |         | MR Egger                  | 0.85 (0.64-1.13) | 0.273    |
| TG<br>(Male)      | 80      | Inverse variance weighted | 0.81 (0.71-0.92) | 0.002    |
|                   |         | Weighted median           | 0.80 (0.65-0.98) | 0.028    |
|                   |         | Weighted mode             | 0.82 (0.68-1.00) | 0.052    |
|                   |         | MR Egger                  | 0.88 (0.72-1.08) | 0.217    |

LDL-C, low-density lipoprotein cholesterol; TC, total cholesterol; TG, triglyceride; HDL-C, high-density lipoprotein cholesterol; AA, Aortic aneurysm; CI, confidence interval; OR, odds ratio.

**Table S6.** Causal estimates of genetically predicted plasma lipid levels on the risk of AD, stratified by gender

| Exposure          | SNP (n) | Method                    | OR (95% CI)      | <i>p</i> value |
|-------------------|---------|---------------------------|------------------|----------------|
| HDL-C<br>(Female) | 154     | Inverse variance weighted | 1.11 (0.52-2.37) | 0.787          |
|                   |         | Weighted median           | 2.12 (0.57-7.95) | 0.264          |
|                   |         | Weighted mode             | 1.54 (0.38-6.34) | 0.548          |
|                   |         | MR Egger                  | 1.61 (0.43-5.99) | 0.479          |
| HDL-C<br>(Male)   | 110     | Inverse variance weighted | 1.06 (0.38-2.97) | 0.908          |
|                   |         | Weighted median           | 2.00 (0.41-9.80) | 0.391          |
|                   |         | Weighted mode             | 0.93 (0.15-5.65) | 0.935          |
|                   |         | MR Egger                  | 0.93 (0.16-5.39) | 0.939          |
| LDL-C<br>(Female) | 97      | Inverse variance weighted | 0.84 (0.56-1.24) | 0.379          |
|                   |         | Weighted median           | 0.63 (0.33-1.20) | 0.158          |
|                   |         | Weighted mode             | 0.63 (0.33-1.22) | 0.176          |
|                   |         | MR Egger                  | 0.83 (0.46-1.48) | 0.525          |
| HDL-C<br>(Male)   | 71      | Inverse variance weighted | 0.97 (0.60-1.57) | 0.912          |
|                   |         | Weighted median           | 0.72 (0.35-1.46) | 0.360          |
|                   |         | Weighted mode             | 0.71 (0.37-1.36) | 0.305          |
|                   |         | MR Egger                  | 0.85 (0.43-1.68) | 0.640          |
| TG<br>(Female)    | 116     | Inverse variance weighted | 0.92 (0.62-1.37) | 0.679          |
|                   |         | Weighted median           | 1.20 (0.63-2.29) | 0.578          |
|                   |         | Weighted mode             | 1.05 (0.53-2.11) | 0.884          |
|                   |         | MR Egger                  | 1.07 (0.56-2.02) | 0.842          |
| TG<br>(Male)      | 80      | Inverse variance weighted | 0.96 (0.69-1.33) | 0.808          |
|                   |         | Weighted median           | 1.13 (0.72-1.80) | 0.590          |
|                   |         | Weighted mode             | 1.13 (0.73-1.76) | 0.587          |
|                   |         | MR Egger                  | 1.22 (0.74-2.00) | 0.436          |

LDL-C, low-density lipoprotein cholesterol; TC, total cholesterol; TG, triglyceride; HDL-C, high-density lipoprotein cholesterol; AD, Aortic dissection; CI, confidence interval; OR, odds ratio.
